# Supplementary material for: N-doped nonalternant aromatic belt via a six-fold annulative double N-arylation
Source: Royal Society of Chemistry journal article supplement (doi:10.1039/d2sc02647c), 2022-01-01
Supplement: d2sc02647c1.pdf [file d2sc02647c1.pdf]

## Supporting Information

---

### **N-doped Nonalternant Aromatic Belt via a Six-fold Double N-Arylation**

Hiroki Sato,<sup>1</sup> Rie Suizu,<sup>2,3</sup> Tomoki Kato,<sup>2</sup> Akiko Yagi,<sup>1</sup> Yasutomo Segawa,<sup>2,4,5,6,\*</sup> Kunio Awaga,<sup>2,7</sup> and Kenichiro Itami<sup>1,2,6,7,\*</sup>

<sup>1</sup> Institute of Transformative Bio-Molecules (WPI-ITbM), Nagoya University, Chikusa, Nagoya 464-8602, Japan

<sup>2</sup> Graduate School of Science, Nagoya University, Chikusa, Nagoya 464-8602, Japan

<sup>3</sup> Japan Science and Technology Agency (JST), PRESTO, 4-1-8 Honcho, Kawaguchi, Saitama, 332-0012, Japan

<sup>4</sup> Institute for Molecular Science, Myodaiji, Okazaki, 444-8787, Japan.

<sup>5</sup> Department of Structural Molecular Science, SOKENDAI (The Graduate University for Advanced Studies), Myodaiji, Okazaki, 444-8787, Japan.

<sup>6</sup> JST-ERATO, Itami Molecular Nanocarbon Project, Nagoya University, Chikusa, Nagoya 464-8602, Japan

<sup>7</sup> Integrated Research Consortium on Chemical Sciences (IRCCS), Nagoya University, Chikusa, Nagoya 464-8602, Japan

\*E-mail: segawa@ims.ac.jp (Y.S.), itami@chem.nagoya-u.ac.jp (K.I.)

---

#### **Table of Contents**

|                                                                          |        |
|--------------------------------------------------------------------------|--------|
| 1. Instrumentation and chemicals                                         | S2–3   |
| 2. Synthesis of N-belt <b>2</b> and $2^{2+} \cdot 2[B(C_6F_5)_4]^-$      | S4–7   |
| 3. X-ray crystallography of <b>2</b> and $2^{2+} \cdot 2[B(C_6F_5)_4]^-$ | S8     |
| 4. Photophysical measurements of N-belt <b>2</b>                         | S9     |
| 5. Electrochemical measurements of N-belt <b>2</b>                       | S11    |
| 6. Computational study                                                   | S12–32 |
| 7. References                                                            | S33    |

## 1. Instrumentation and chemicals

Materials. Unless otherwise noted, all reactions were performed with dry solvents under an atmosphere of nitrogen in dried glassware with standard vacuum-line techniques. Materials were obtained from commercial suppliers and used without further purification. Silver salt  $\text{Ag}[\text{B}(\text{C}_6\text{F}_5)_4]$  was prepared following the known procedure.<sup>1</sup> Macrocycle precursor **1** was prepared following our previous paper.<sup>2</sup>

Dichloromethane (DCM) for reactions was purified by passing through a solvent purification system (Glass Contour). All work-up and purification procedures were carried out with reagent-grade solvents in air. Analytical thin-layer chromatography (TLC) was performed using E. Merck silica gel 60 F254 coated plates (0.25 mm). The developed chromatogram was analyzed by UV lamp (254 nm and 365 nm). Flash column chromatography was performed with E. Merck silica gel 60 (230–400 mesh). Membrane filtration was performed with Merck Milipore Ltd. Millex<sup>®</sup> LH 0.45  $\mu\text{m}$ . Preparative HPLC was performed using YMC Multiple preparative HPLC LC-Forte/R instrument equipped with YMC-Actus SIL 250  $\times$  30.0 mm S-5  $\mu\text{m}$  12nm column.

Measurements. Melting points were measured on a MPA100 Optimelt automated melting point system. High-resolution mass spectra (HRMS) were determined on a JEOL JMS-S3000 SpiralTOF (MALDI-TOF MS) using polyethyleneglycol mixture (PEG) as internal standards and *trans*-2-[3-(4-*tert*-butylphenyl)-2-methyl-2-propenylidene] malononitrile (DCTB) as matrix with NaI as cationizing agent. Nuclear magnetic resonance (NMR) spectra were recorded on JEOL spectrometers (JNM-ECA-600:  $^1\text{H}$  600 MHz,  $^{13}\text{C}$  150 MHz; JEOL ECA 500II:  $^1\text{H}$  500 MHz,  $^{13}\text{C}$  125 MHz). Chemical shifts for  $^1\text{H}$  NMR are expressed in parts per million (ppm) relative to  $\text{CH}_2\text{Cl}_2$  ( $\delta$  5.32 ppm).  $^{13}\text{C}$  NMR spectra were run using a proton-decoupled pulse sequence. Chemical shifts for  $^{13}\text{C}$  NMR are expressed in ppm relative to  $\text{CD}_2\text{Cl}_2$  ( $\delta$  54.0 ppm). The following abbreviations were used to explain the multiplicities: s (singlet), d (doublet), t (triplet), sept (septuplet), m (multiplet). Coupling constants,  $J$ , are reported in Hz and with an accuracy of one unit of the last digit.

For photophysical measurements, dilute solutions in degassed spectral grade dichloromethane in a 1 cm square quartz cell were used. UV–vis absorption spectra were recorded on a Shimadzu UV-3510 spectrometer with a resolution of 0.2. UV-Vis-NIR absorption spectra were recorded on a JASCO UV V-570 spectrometer with a resolution of 2 nm between 250 nm to 2500 nm. Fluorescence spectra were recorded with a Shimadzu RF6000 spectrofluorometer using a 0.1

nm bandwidth in both excitation and emission. Absolute FL quantum yields were determined with the same instrument equipped with a calibrated integrating sphere. Electron paramagnetic resonance (EPR) spectra were recorded on JEOL ESR JES TE-200 instruments using quartz Schlenk tube filled with Ar.

## 2. Synthesis of N-belt (2) and dication salt $2^{2+} \cdot 2[B(C_6F_5)_4]^-$

### Synthesis of N-belt 2 via a palladium catalyzed 6-fold double N-arylation

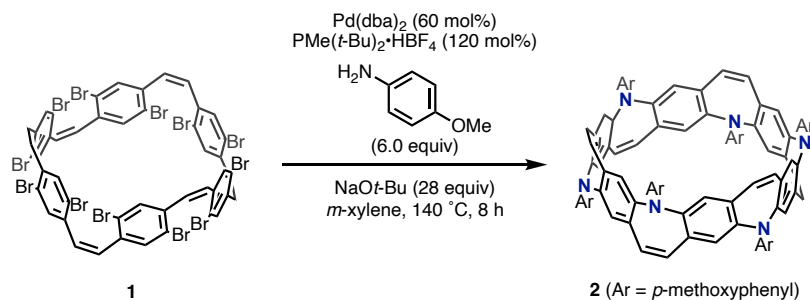

To a dry Schlenk tube equipped with argon containing a magnetic stirring bar were added **1** (122.0 mg, 78.1  $\mu$ mol), *p*-anisidine (56.7 mg, 460  $\mu$ mol), Pd(dba)<sub>2</sub> (26.4 mg, 45.9  $\mu$ mol), PMe(*t*-Bu)<sub>2</sub>·HBF<sub>4</sub> (23.0 mg, 92.7  $\mu$ mol), and NaO*t*-Bu (211 mg, 2.19 mmol). Then, the flask was replaced by argon gas with a balloon. To this flask was added *m*-xylene (4.8 mL), and Schlenk tube was capped. After stirring at 140 °C for 8 h, 3.0 g silica gel was added and the solvent was removed by rotary evaporation. After removal of the solvent, the product on silica was put on silica pad and eluted with toluene/EtOAc = 90:10. Then, the filtrate was concentrated and further purified by preparative HPLC (42 mL/min, toluene/EtOAc = 95:5) to afford N-belt **2** (2.4 mg, 1.8  $\mu$ mol, 2.3%) as a yellow powder. <sup>1</sup>H NMR (600 MHz, CD<sub>2</sub>Cl<sub>2</sub>)  $\delta$  7.36 (s, 12H), 6.77 (s, 12H), 6.69 (d, *J* = 8.9 Hz, 12 H), 6.44 (d, *J* = 8.9 Hz, 12H), 3.71 (s, 18H). <sup>13</sup>C NMR (150 MHz, CD<sub>2</sub>Cl<sub>2</sub>)  $\delta$  153.3, 143.02, 142.97, 138.8, 132.2, 130.7, 114.6, 113.6, 56.1. HRMS (MALDI-TOF, DCTB matrix): Exact mass calculated for C<sub>90</sub>H<sub>66</sub>N<sub>6</sub>O<sub>6</sub> ([M]<sup>+</sup>): *m/z* = 1326.5038, mass found: 1326.5020; melting point: decomposed  $\sim$ 210 °C. *R<sub>f</sub>* = 0.2–0.4 (dichloromethane).

# <sup>1</sup>H NMR spectrum of **2**

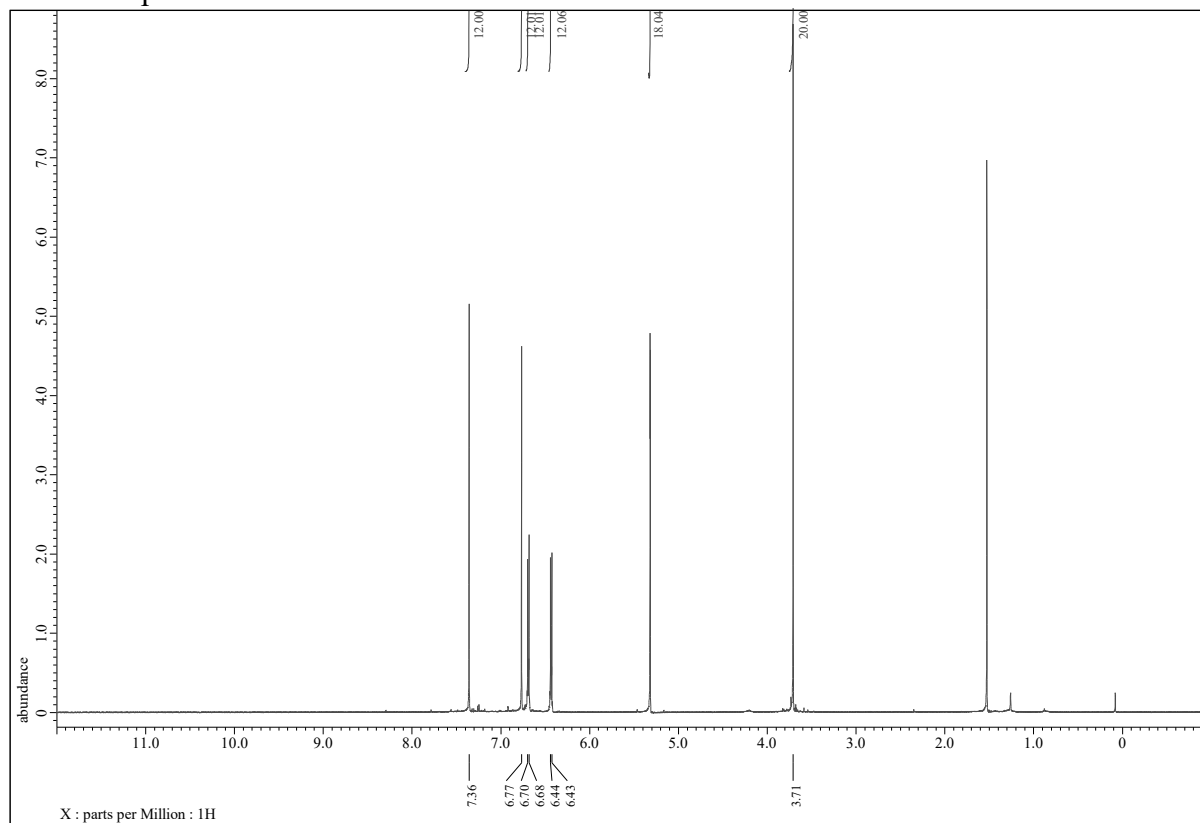

# <sup>13</sup>C NMR spectrum of **2**

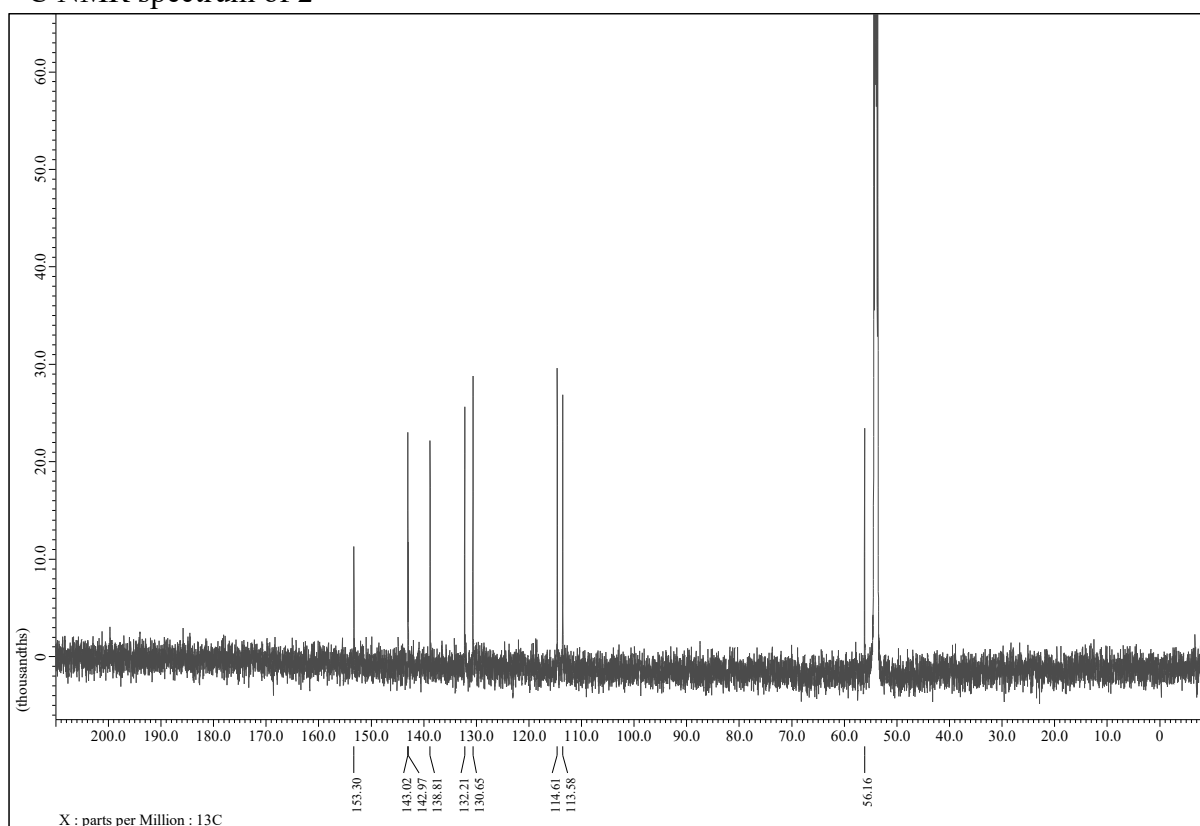

HRMS (MALDI-TOF) of **2**

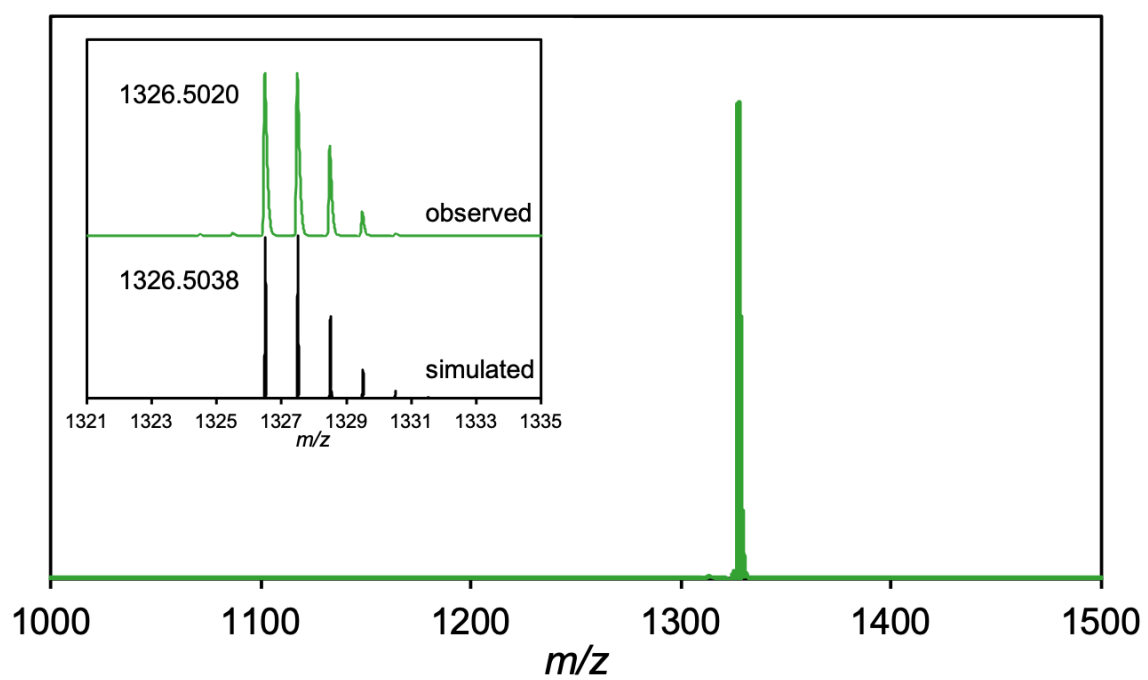

### N-Belt dication $2^{2+} \cdot 2[B(C_6F_5)_4]^-$

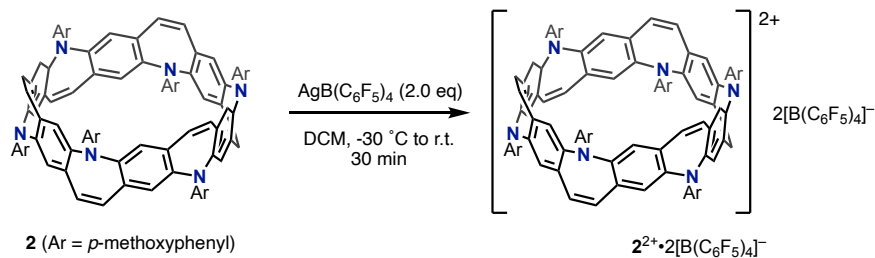

To a dry Schlenk tube equipped with argon containing a magnetic stirring bar was added N-belt **2** (2.0 mg, 1.5  $\mu$ mol). Then, dichloromethane (DCM, 1.5 mL) was added, and the mixture was cooled down to  $-30$   $^{\circ}$ C. To the reaction mixture was slowly added 1.0 mM  $Ag[B(C_6F_5)_4]$  (3.0 mL, 3.0  $\mu$ mol) at  $-30$   $^{\circ}$ C. Then, the mixture was gradually warmed up to ambient temperature and stirred for 30 min. After stirring, the mixture was concentrated under vacuum until 0.5 mL solvent remained and transferred to a glass tube through membrane filter *via* syringe. Then, the mixture was slowly diffused in hexane under argon atmosphere at  $-30$   $^{\circ}$ C in dark. After 1 week, purple crystal appeared in the solution, which was filtered and washed by hexane under  $N_2$  atmosphere. After dried under vacuum, N-belt dication  $2^{2+} \cdot 2[B(C_6F_5)_4]^-$  was obtained as a purple crystal.

### 3. X-ray crystallography

Details of the crystal data and a summary of the intensity data collection parameters are listed in Table S1. A suitable crystal was mounted with mineral oil on a MiTeGen MicroMounts and transferred to the goniometer of the kappa goniometer of a RIGAKU XtaLAB Synergy-S system with 1.2 kW MicroMax-007HF microfocus rotating anode (Graphite-monochromated Mo K $\alpha$  radiation ( $\lambda = 0.71073$  Å)) and PILATUS200K hybrid photon-counting detector. Cell parameters were determined and refined, and raw frame data were integrated using CrysAlisPro (Agilent Technologies, 2010). The structures were solved by direct methods with SHELXT<sup>3</sup> and refined by full-matrix least-squares techniques against  $F^2$  (SHELXL-2018/3)<sup>4</sup> by using Olex2 software package.<sup>5</sup> The intensities were corrected for Lorentz and polarization effects. The non-hydrogen atoms were refined anisotropically. Hydrogen atoms were placed using AFIX instructions. CCDC 2133103 (**2**) and 2133104 ( $\mathbf{2}^{2+} \cdot 2[\text{B}(\text{C}_6\text{F}_5)_4]^-$ ) contain the supplementary crystallographic data for this paper. These data can be obtained free of charge from The Cambridge Crystallographic Data Centre via [www.ccdc.cam.ac.uk/data\\_request/cif](http://www.ccdc.cam.ac.uk/data_request/cif).

**Table S1.** Crystallographic data for **2** and dication salt  $\mathbf{2}^{2+} \cdot 2[\text{B}(\text{C}_6\text{F}_5)_4]^-$ .

|                                                                                      | <b>2</b>              | $\mathbf{2}^{2+} \cdot 2[\text{B}(\text{C}_6\text{F}_5)_4]^-$ |
|--------------------------------------------------------------------------------------|-----------------------|---------------------------------------------------------------|
| formula                                                                              | C95H78N6O6            | C79H55.5BCl2F20N3O3                                           |
| fw                                                                                   | 1399.63               | 1556.47                                                       |
| <i>T</i> (K)                                                                         | 123(2)                | 123(2)                                                        |
| $\lambda$ (Å)                                                                        | 0.71073               | 0.71073                                                       |
| cryst syst                                                                           | Trigonal              | Monoclinic                                                    |
| space group                                                                          | <i>R</i> -3           | <i>I</i> 2/ <i>a</i>                                          |
| <i>a</i> (Å)                                                                         | 22.2142 (14)          | 32.5289(11)                                                   |
| <i>b</i> (Å)                                                                         | 22.2142 (14)          | 13.8777(4)                                                    |
| <i>c</i> (Å)                                                                         | 12.977 (2)            | 32.5269(15)                                                   |
| $\alpha$ (deg)                                                                       | 90                    | 90                                                            |
| $\beta$ (deg)                                                                        | 90                    | 96.618(4)                                                     |
| $\gamma$ (deg)                                                                       | 120                   | 90                                                            |
| <i>V</i> (Å <sup>3</sup> )                                                           | 5545.8 (12)           | 14585.7(9)                                                    |
| <i>Z</i>                                                                             | 3                     | 8                                                             |
| <i>D</i> <sub>calc</sub> (g / cm <sup>3</sup> )                                      | 1.257                 | 1.418                                                         |
| $\mu$ (mm <sup>-1</sup> )                                                            | 0.079                 | 0.1192                                                        |
| <i>F</i> (000)                                                                       | 2214                  | 6348.0                                                        |
| cryst size (mm)                                                                      | 0.010 × 0.010 × 0.010 | 0.15 × 0.10 × 0.05                                            |
| $\theta$ range (deg)                                                                 | 1.833–24.992          | 2.384–31.26                                                   |
| reflns collected                                                                     | 6084                  | 68811                                                         |
| indep reflns/ <i>R</i> <sub>int</sub>                                                | 2175 / 0.0965         | 21919 / 0.0908                                                |
| params                                                                               | 200                   | 1017                                                          |
| GOF on $F^2$                                                                         | 0.988                 | 1.021                                                         |
| <i>R</i> <sub>1</sub> , <i>wR</i> <sub>2</sub> [ <i>I</i> > 2 $\sigma$ ( <i>I</i> )] | 0.0815, 0.1882        | 0.1162, 0.2728                                                |
| <i>R</i> <sub>1</sub> , <i>wR</i> <sub>2</sub> (all data)                            | 0.1804, 0.2443        | 0.3059, 0.3935                                                |



## 4. Photophysical properties of N-belt 2

### Absorption spectrum of 2

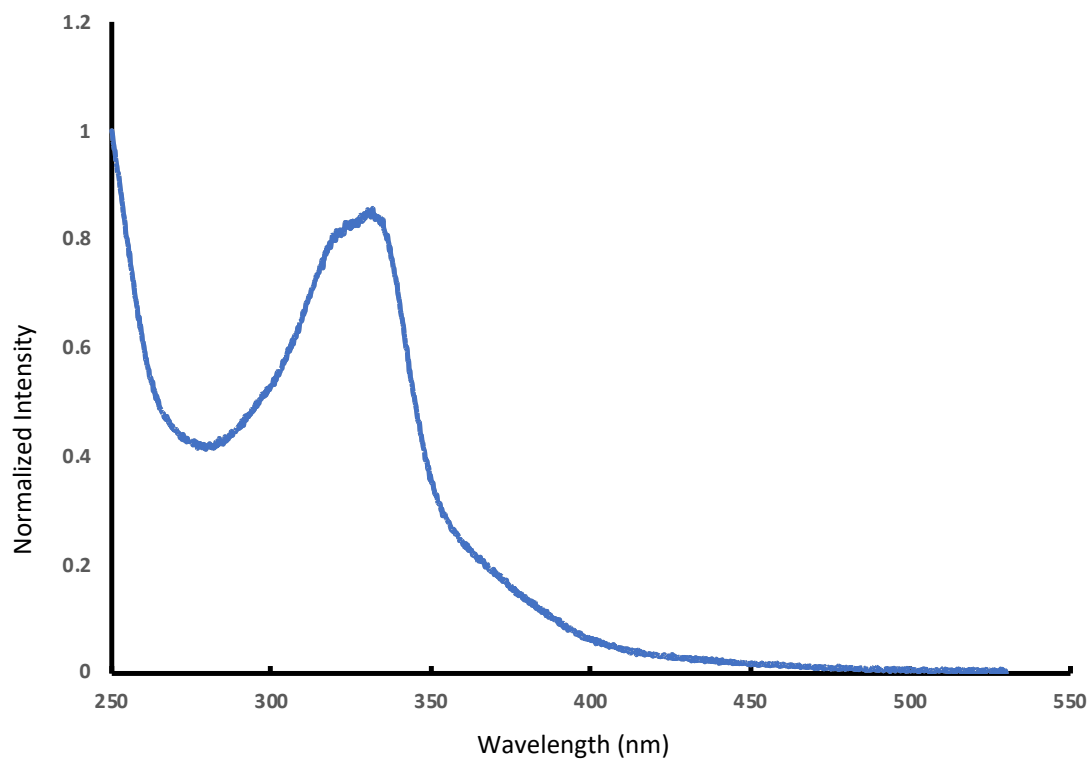

**Fig S1.** Absorption spectrum of **2**. Measurement was carried out under following conditions; solvent: DCM, concentration of **2**:  $5.0 \times 10^{-6}$  M, room temperature.

### Titration of the N-belt (**2**) with oxidant

Dichloromethane solutions of cationic species of N-belt **2** prepared by chemical oxidation with  $\text{AgSbF}_6$  were used for measurement. The samples were prepared as following the procedure: To the 0.2 mM solution of **2** in DCM was added 2.0 mM  $\text{AgSbF}_6$  solution in DCM at  $-30\text{ }^\circ\text{C}$  under argon atmosphere. Then, the reaction mixture was warmed gradually to the ambient temperature and stirred for 30 minutes at the same temperature. After stirring, the reaction mixture was diluted to  $5.0 \times 10^{-5}\text{ M}$  in DCM and transferred to quartz cell through membrane filter by syringe.

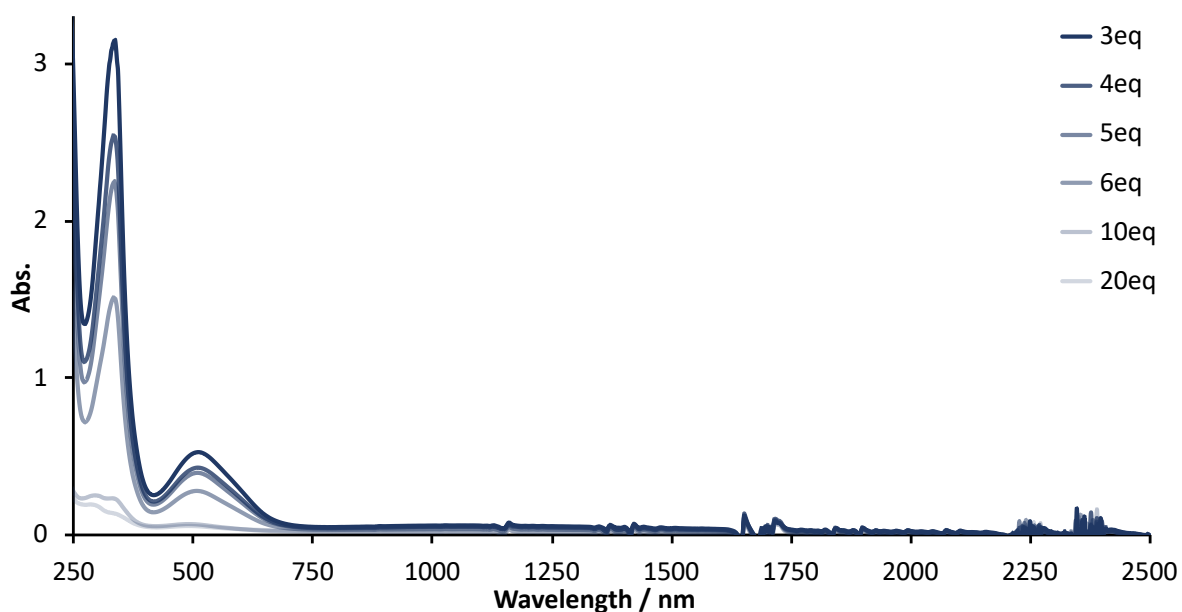

**Fig S2.** The UV-Vis-NIR measurement was carried out under following conditions; solvent: DCM, concentration of **2**:  $5.0 \times 10^{-5}\text{ M}$ , oxidant:  $\text{AgSbF}_6$ , room temperature.

## 5. Electrochemical measurements of N-belt 2

Cyclic voltammetry (CV) and differential pulse voltammetry (DPV) of N-belt **2** were measured under the following conditions: 0.1 M TBAPF<sub>6</sub> and 1.0 mM **2** in DCM, Pt reference electrode, Pt working electrode, titanium counter electrode and scan rate of 100 mV·s<sup>-1</sup> for CV and 20 mV·s<sup>-1</sup> for DPV. The measurements were carried out under a nitrogen atmosphere.

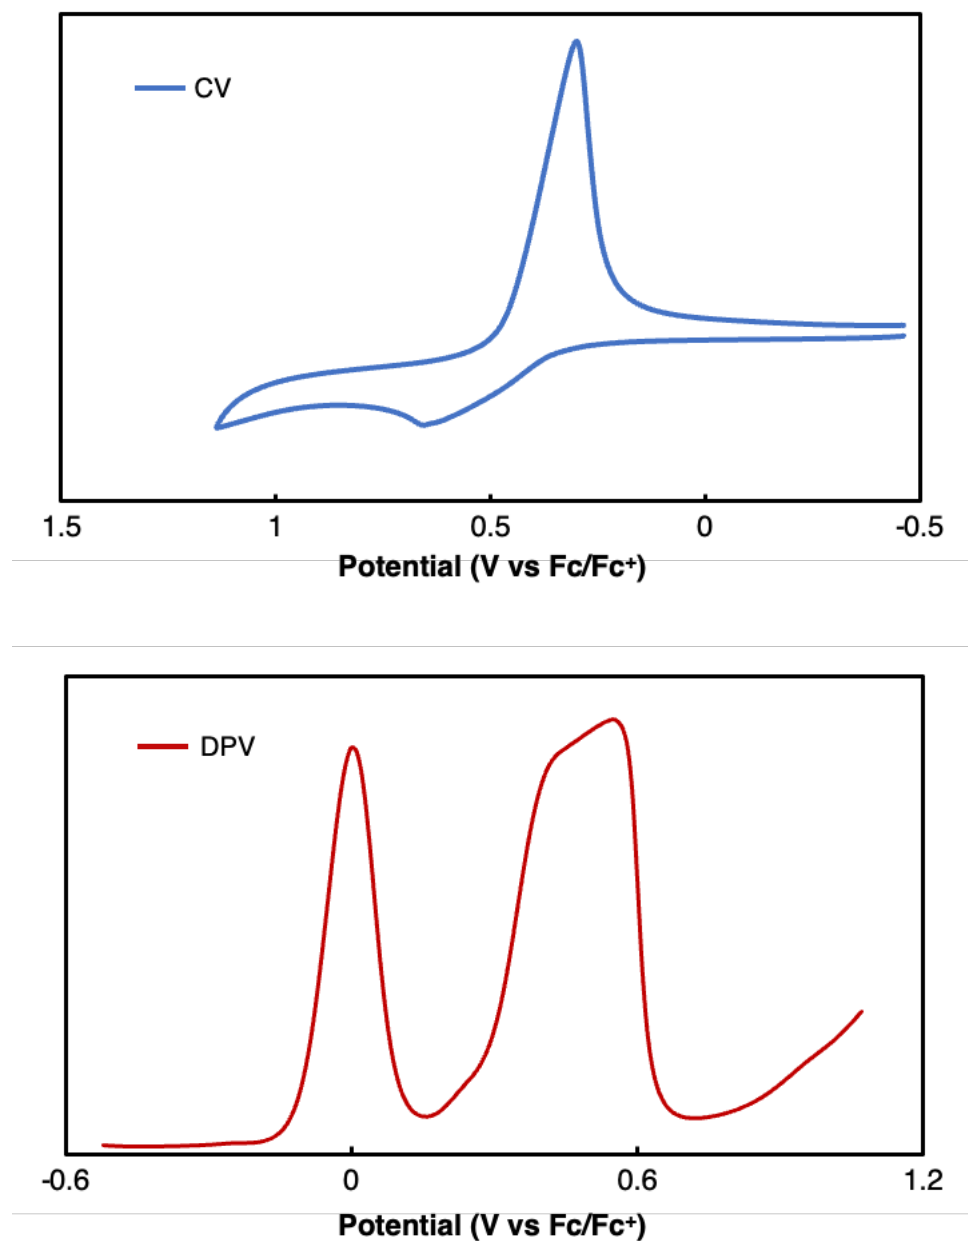

**Fig S3.** Cyclic voltammogram and differential pulse voltammogram of **2**.  $E^{\text{Ox}1} = 0.43$  V (vs Fc/Fc<sup>+</sup>),  $E^{\text{Ox}2}$  (V) = 0.54 V (vs Fc/Fc<sup>+</sup>), where  $E^{\text{Ox}}$  were determined as the peak values in DPV.

## 6. Computational study

For DFT calculation, the Gaussian 16 suite of programs<sup>6</sup> running on a NEC LX system was used. All molecules were fully optimized using (U)B3LYP level of theory<sup>7</sup> with 6-31G(d) basis set. For singlet biradical states, symmetry-broken UB3LYP/6-31G(d) method was employed with a keyword “guess=mix”. Harmonic vibration frequency calculation at the same level was performed to verify all stationary points as local minima (with no imaginary frequency) or transition states (with one imaginary frequency). Time-dependent DFT (TD-DFT) calculations were performed at (U)B3LYP level of theory with 6-31G(d) basis set. Visualization of the results was performed by the use of GaussView 6.0.16 software.

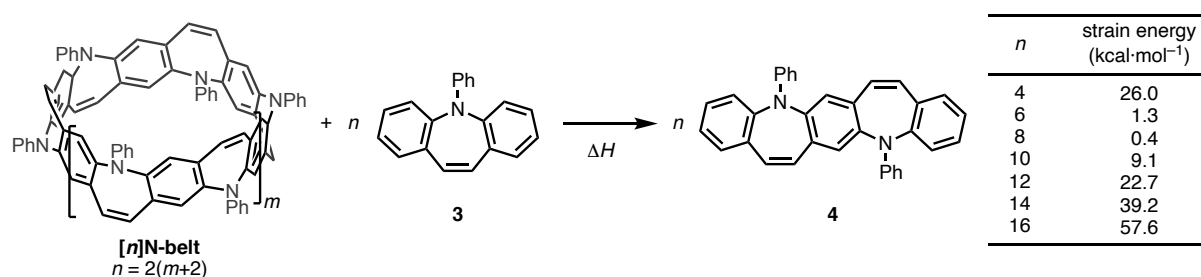

**Fig S4.** (a) Hypothetical homodesmotic reactions for the calculation of the strain energies of [*n*]N-belt. (b)

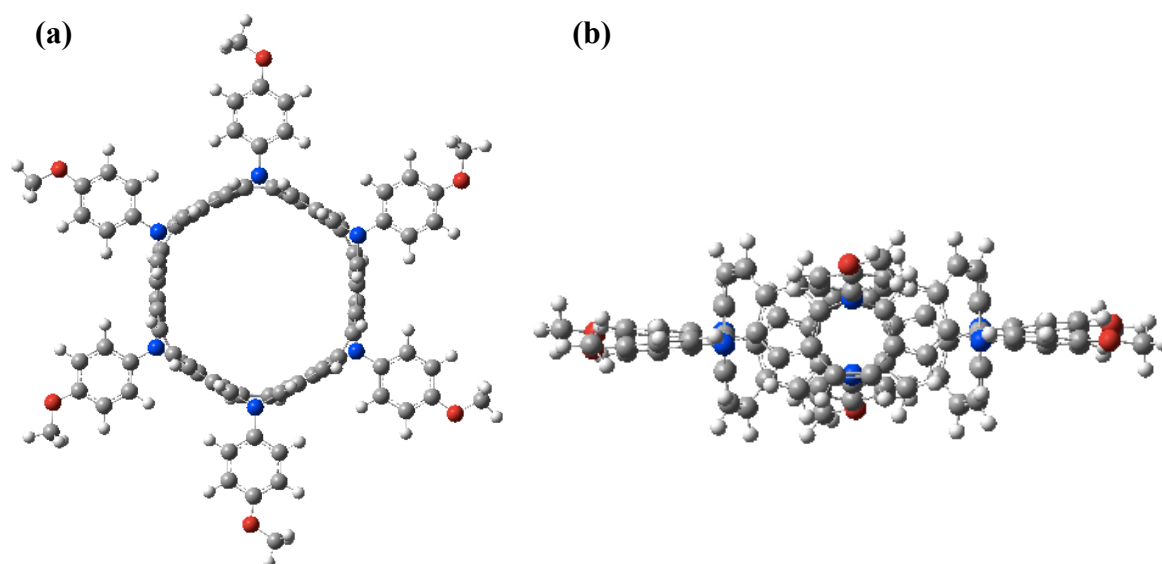

**Fig S5.** Optimized structure of **2**. (a) Top view; (b) side view.

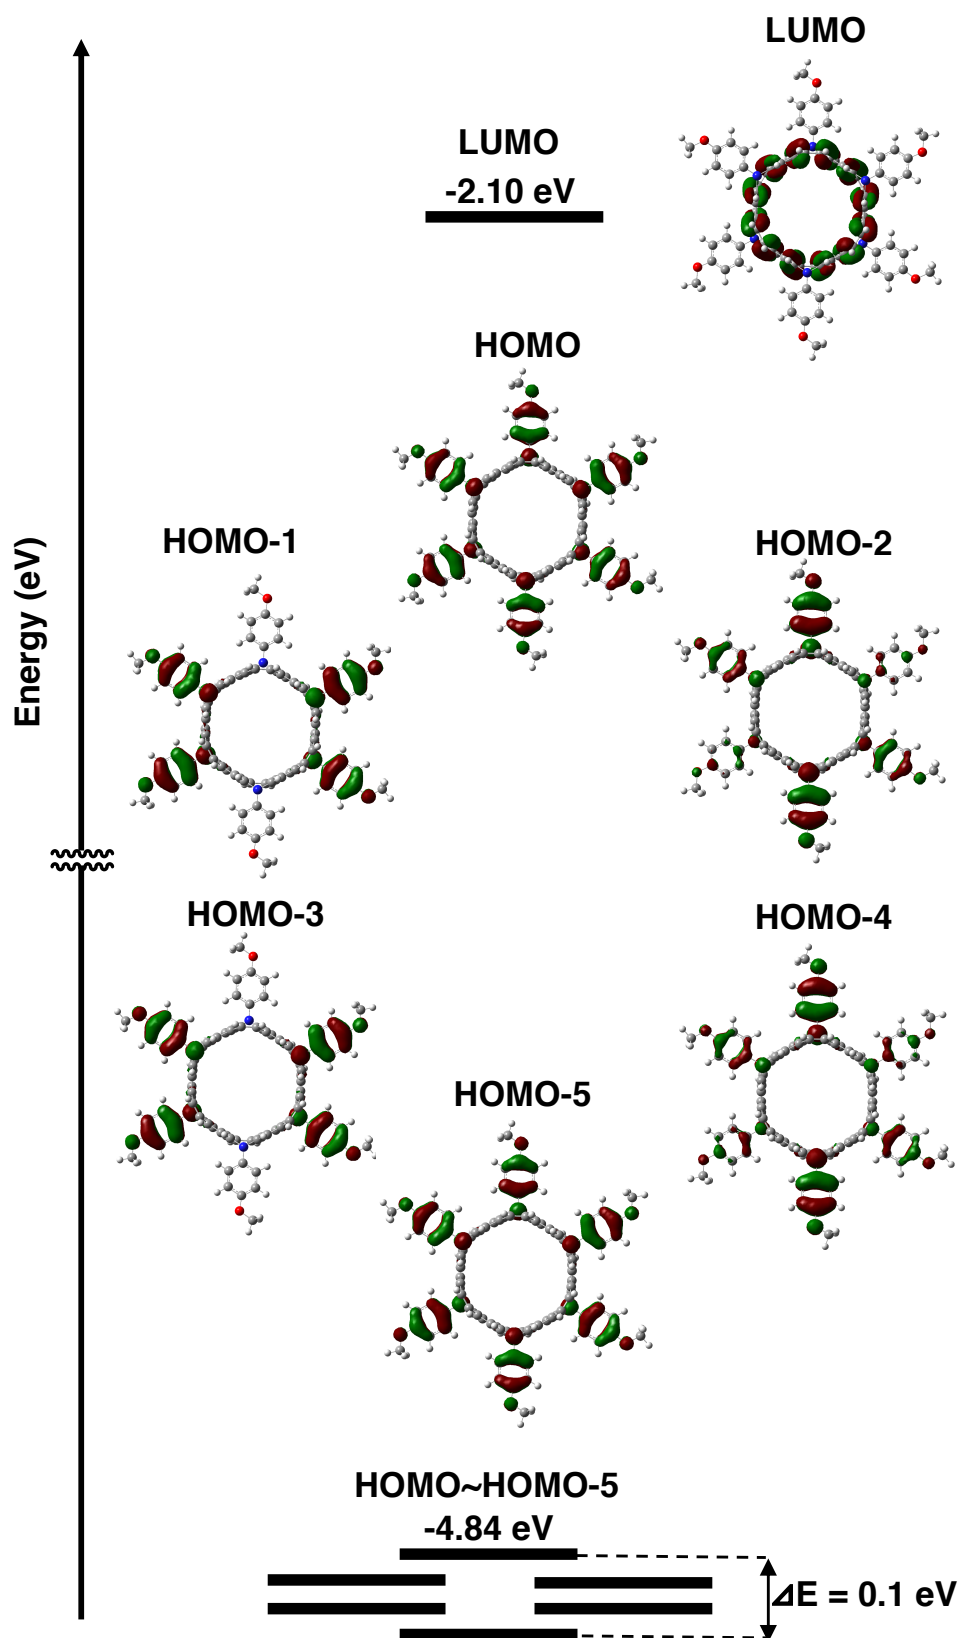

**Fig S6.** Frontier molecular orbitals (isovalue = 0.02) and energy diagram of **2**.

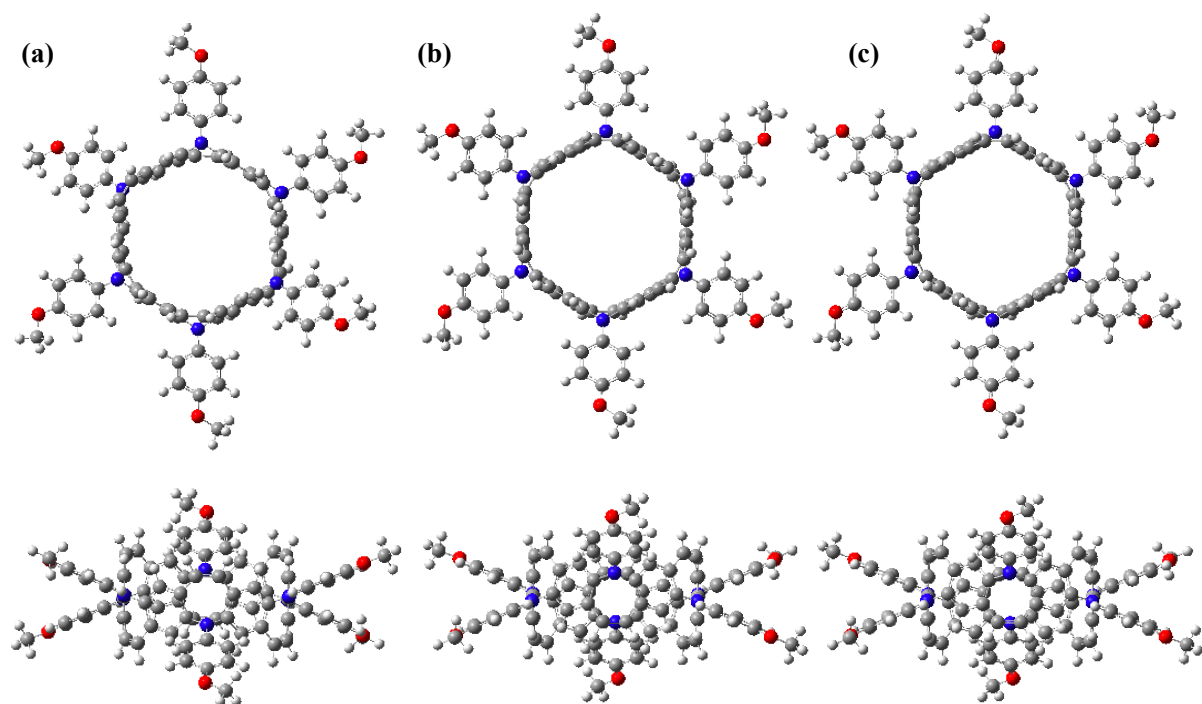

**Fig S7.** Optimized structure of N-belt **2** cations (a)  $2^+$  UB3LYP (b)  $2^{2+}$  UB3LYP\_T (c)  $2^{3+}$  UB3LYP\_Q. (T, triplet; Q, quartet).

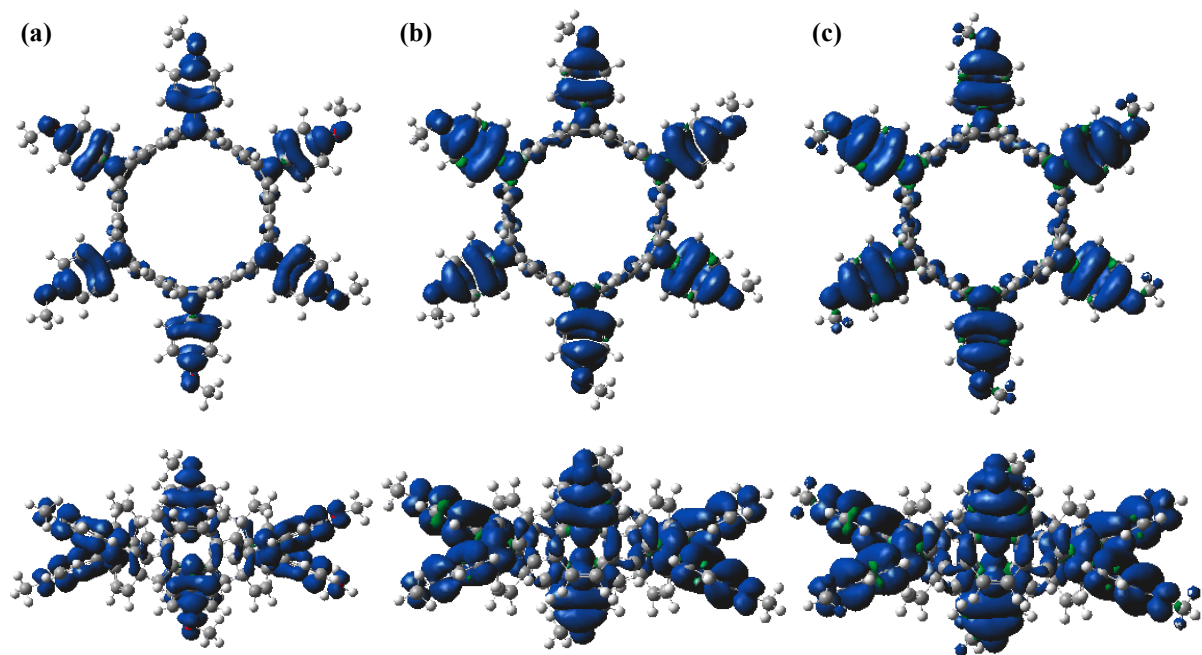

**Fig S8.** Spin density maps (isovalue = 0.0004) calculated for N-belt **2** cations (a)  $2^+$  UB3LYP (b)  $2^{2+}$  UB3LYP\_T (c)  $2^{3+}$  UB3LYP\_Q. (T, triplet; Q, quartet).

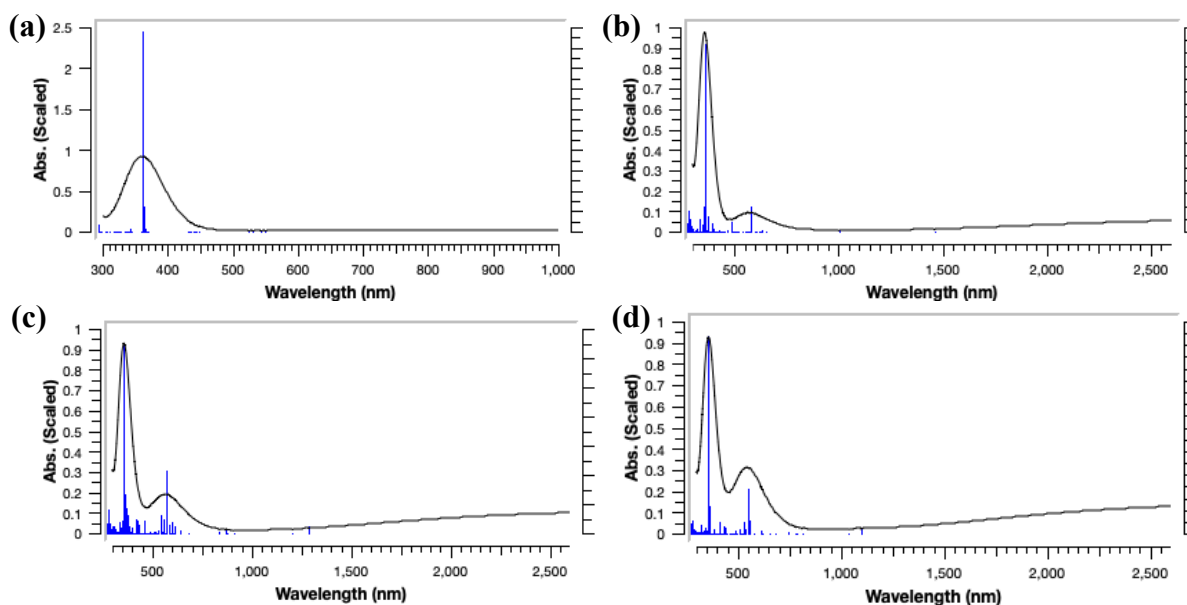

**Fig S9.** Time dependent-DFT (TD-DFT) calculations. Calculated stick spectra at B3LYP/6-31G(d) of (a) neutral **2** and UB3LYP/6-31G(d) of (b) radical cation **2<sup>+</sup>**, (c) dication **2<sup>2+</sup>** with triplet state, and (d) trication **2<sup>3+</sup>** with quartet state.

**Table S2.** The TD-DFT calculation results. (a) **2** (B3LYP/6-31G(d)) (b) **2<sup>+</sup>** (UB3LYP/6-31G(d)) (c) **2<sup>2+</sup>** (UB3LYP/6-31G(d)\_T) (d) **2<sup>3+</sup>** (UB3LYP/6-31G(d)\_Q)

(a) **2** (B3LYP/6-31G(d)) E = -4249.03532993 Hartree

Excited State 1: Singlet-AG 2.2523 eV 550.47 nm f=0.0000 <S\*\*2>=0.000

346 -> 351 -0.16653

347 -> 350 0.16653

348 -> 349 0.65796

This state for optimization and/or second-order correction.

Total Energy, E(TD-HF/TD-DFT) = -4248.95256587

Copying the excited state density for this state as the 1-particle RhoCI density.

Excited State 27: Singlet-EU 3.4383 eV 360.59 nm f=0.9802 <S\*\*2>=0.000

340 -> 349 0.18851

341 -> 349 -0.35697

342 -> 350 0.45244

342 -> 351 -0.21802

343 -> 355 -0.10423

344 -> 352 0.21848

Excited State 28: Singlet-EU 3.4383 eV 360.59 nm f=0.9803 <S\*\*2>=0.000

340 -> 349 -0.35698  
341 -> 349 -0.18851  
342 -> 350 0.21802  
342 -> 351 0.45244  
343 -> 356 0.10423  
345 -> 352 -0.21847

2<sup>+</sup>(UB3LYP/6-31G(d)) E = -4248.83612625 Hartree

Excited State 1: 2.003-EU 0.2119 eV 5850.74 nm f=0.0775 <S\*\*2>=0.753

346B -> 348B 1.19210  
346B <- 348B -0.65006

This state for optimization and/or second-order correction.

Total Energy, E(TD-HF/TD-DFT) = -4248.82833863

Copying the excited state density for this state as the 1-particle RhoCI density.

Excited State 23: 2.007-EU 2.1514 eV 576.29 nm f=0.0962 <S\*\*2>=0.757

328B -> 348B 0.20034  
329B -> 348B 0.97110

Excited State 24: 2.007-EU 2.1514 eV 576.29 nm f=0.0962 <S\*\*2>=0.757

328B -> 348B 0.97110  
329B -> 348B -0.20034

Excited State 97: 2.101-EU 3.4640 eV 357.92 nm f=0.7351 <S\*\*2>=0.854

341A -> 349A 0.14285  
342A -> 350A 0.66516  
343A -> 355A -0.10238  
344A -> 352A -0.10233  
341B -> 349B 0.22718  
342B -> 350B 0.58138

Excited State 98: 2.101-EU 3.4640 eV 357.92 nm f=0.7351 <S\*\*2>=0.854



|              |          |
|--------------|----------|
| 340A -> 349A | -0.14286 |
| 342A -> 351A | 0.66516  |
| 343A -> 356A | 0.10238  |
| 345A -> 352A | 0.10233  |
| 340B -> 349B | -0.22718 |
| 342B -> 351B | 0.58138  |

**2<sup>2+</sup>** (UB3LYP/6-31G(d)\_T) E = -4248.57604166 Hartree

Excited State 1: 3.006-AG 0.0719 eV 17233.21 nm f=0.0000 <S\*\*2>=2.010

|              |          |
|--------------|----------|
| 345B -> 348B | -0.28510 |
| 346B -> 347B | -1.00106 |
| 346B <- 347B | 0.28289  |

This state for optimization and/or second-order correction.

Total Energy, E(TD-HF/TD-DFT) = -4248.57339774

Copying the excited state density for this state as the 1-particle RhoCI density.

Excited State 30: 3.014-AU 2.1740 eV 570.31 nm f=0.2159 <S\*\*2>=2.021

|              |          |
|--------------|----------|
| 326B -> 347B | -0.13981 |
| 327B -> 347B | -0.20382 |
| 328B -> 348B | 0.30062  |
| 329B -> 347B | 0.39020  |
| 330B -> 348B | 0.18853  |
| 331B -> 348B | 0.36492  |
| 333B -> 347B | 0.59224  |
| 334B -> 347B | 0.18647  |
| 335B -> 347B | -0.17587 |
| 336B -> 348B | -0.17326 |
| 338B -> 347B | 0.21487  |

Excited State 127: 3.260-AU 3.4726 eV 357.03 nm f=0.6545 <S\*\*2>=2.406

|              |          |
|--------------|----------|
| 340A -> 349A | 0.47986  |
| 342A -> 350A | 0.26839  |
| 342A -> 351A | 0.18806  |
| 344A -> 357A | -0.11914 |

340B -> 349B 0.45980  
 342B -> 350B 0.32007  
 342B -> 351B 0.17824  
 343B -> 354B -0.25344  
 343B -> 359B -0.15090  
 344B -> 357B 0.15959  
 345B -> 358B 0.16565  
 346B -> 355B -0.12020

Excited State 129: 3.297-AU 3.4872 eV 355.54 nm f=0.5965 <S\*\*2>=2.468

342A -> 351A 0.57676  
 343A -> 355A -0.24949  
 344A -> 352A -0.34824  
 347A -> 354A 0.12599  
 347A -> 356A 0.10108  
 341B -> 349B 0.12748  
 342B -> 351B 0.43682  
 343B -> 356B 0.12317  
 344B -> 352B -0.12182

2<sup>3+</sup> (UB3LYP/6-31G(d)\_Q) E = -4248.25556306 Hartree

Excited State 1: 4.009-AU 0.0993 eV 12490.76 nm f=0.0000 <S\*\*2>=3.767

344B -> 346B -0.73678  
 344B -> 347B -0.11675  
 345B -> 346B -0.11663  
 345B -> 347B 0.73733  
 344B <- 346B -0.23636  
 345B <- 347B 0.23584

This state for optimization and/or second-order correction.

Total Energy, E(TD-HF/TD-DFT) = -4248.25191530

Copying the excited state density for this state as the 1-particle RhoCI density

Excited State 138: 4.051-AU 3.4635 eV 357.97 nm f=0.8372 <S\*\*2>=3.854

341A -> 349A 0.25796

342A -> 350A 0.64187

341B -> 349B 0.34661

342B -> 350B 0.55996

Excited State 139: 4.051-AU 3.4637 eV 357.95 nm f=0.8356 <S\*\*2>=3.854

340A -> 349A -0.25770

342A -> 351A 0.64207

340B -> 349B -0.34691

342B -> 351B 0.55980

**Table S3.** Cartesian coordinates of optimized structures with uncorrected and thermal-corrected (298 K) energies of stationary points (Hartree).

[4]N-belt E = -2374.56844998, H = -2373.764196

|   |           |           |           |   |           |           |           |   |           |           |           |
|---|-----------|-----------|-----------|---|-----------|-----------|-----------|---|-----------|-----------|-----------|
| C | -3.330151 | 0.674356  | 2.173844  | C | 2.820858  | 1.491819  | 1.061317  | H | -1.600789 | -2.718614 | 2.345708  |
| C | -3.330151 | -0.674356 | 2.173844  | C | 3.113525  | 1.172321  | -0.282794 | H | -2.718614 | -1.600789 | -2.345708 |
| C | -2.820858 | -1.491819 | 1.061317  | N | 3.898030  | 0.000000  | -0.542259 | H | -5.236592 | 2.154227  | -1.407034 |
| C | -3.113525 | -1.172321 | -0.282794 | C | 1.873597  | 2.493364  | 1.318569  | H | -7.298431 | 2.148847  | -2.739669 |
| N | -3.898030 | 0.000000  | -0.542259 | C | 1.172321  | 3.113525  | 0.282794  | H | -8.357416 | 0.000000  | -3.437014 |
| C | -3.113525 | 1.172321  | -0.282794 | C | 1.491819  | 2.820858  | -1.061317 | H | -7.298431 | -2.148847 | -2.739669 |
| C | -2.820858 | 1.491819  | 1.061317  | C | 2.493364  | 1.873597  | -1.318569 | H | -5.236592 | -2.154227 | -1.407034 |
| C | -2.493364 | 1.873597  | -1.318569 | C | 5.058943  | 0.000000  | -1.330819 | H | -2.154227 | -5.236592 | 1.407034  |
| C | -1.491819 | 2.820858  | -1.061317 | C | 5.672937  | -1.209086 | -1.710738 | H | -2.148847 | -7.298431 | 2.739669  |
| C | -1.172321 | 3.113525  | 0.282794  | C | 6.846483  | -1.199968 | -2.461287 | H | 0.000000  | -8.357416 | 3.437014  |
| C | -1.873597 | 2.493364  | 1.318569  | C | 7.443823  | 0.000000  | -2.849998 | H | 2.148847  | -7.298431 | 2.739669  |
| C | -1.873597 | -2.493364 | 1.318569  | C | 6.846483  | 1.199968  | -2.461287 | H | 2.154227  | -5.236592 | 1.407034  |
| C | -1.172321 | -3.113525 | 0.282794  | C | 5.672937  | 1.209086  | -1.710738 | H | 1.198258  | -3.593441 | -3.091102 |
| C | -1.491819 | -2.820858 | -1.061317 | C | -1.209086 | 5.672937  | 1.710738  | H | -1.198258 | -3.593441 | -3.091102 |
| C | -2.493364 | -1.873597 | -1.318569 | C | -1.199968 | 6.846483  | 2.461287  | H | 3.593441  | -1.198258 | 3.091102  |
| C | -5.058943 | 0.000000  | -1.330819 | C | 0.000000  | 7.443823  | 2.849998  | H | 3.593441  | 1.198258  | 3.091102  |
| C | -5.672937 | 1.209086  | -1.710738 | C | 1.199968  | 6.846483  | 2.461287  | H | 1.600789  | 2.718614  | 2.345708  |
| C | -6.846483 | 1.199968  | -2.461287 | C | 1.209086  | 5.672937  | 1.710738  | H | 2.718614  | 1.600789  | -2.345708 |
| C | -7.443823 | 0.000000  | -2.849998 | C | 0.000000  | 5.058943  | 1.330819  | H | 5.236592  | -2.154227 | -1.407034 |
| C | -6.846483 | -1.199968 | -2.461287 | N | 0.000000  | 3.898030  | 0.542259  | H | 7.298431  | -2.148847 | -2.739669 |
| C | -5.672937 | -1.209086 | -1.710738 | C | -0.674356 | 3.330151  | -2.173844 | H | 8.357416  | 0.000000  | -3.437014 |
| C | -1.209086 | -5.672937 | 1.710738  | C | 0.674356  | 3.330151  | -2.173844 | H | 7.298431  | 2.148847  | -2.739669 |
| C | -1.199968 | -6.846483 | 2.461287  | C | 3.113525  | -1.172321 | -0.282794 | H | 5.236592  | 2.154227  | -1.407034 |
| C | 0.000000  | -7.443823 | 2.849998  | C | 2.820858  | -1.491819 | 1.061317  | H | -2.154227 | 5.236592  | 1.407034  |
| C | 1.199968  | -6.846483 | 2.461287  | C | 2.493364  | -1.873597 | -1.318569 | H | -2.148847 | 7.298431  | 2.739669  |
| C | 1.209086  | -5.672937 | 1.710738  | C | 1.491819  | -2.820858 | -1.061317 | H | 0.000000  | 8.357416  | 3.437014  |
| C | 0.000000  | -5.058943 | 1.330819  | C | 1.172321  | -3.113525 | 0.282794  | H | 2.148847  | 7.298431  | 2.739669  |
| N | 0.000000  | -3.898030 | 0.542259  | C | 1.873597  | -2.493364 | 1.318569  | H | 2.154227  | 5.236592  | 1.407034  |
| C | 0.674356  | -3.330151 | -2.173844 | H | -3.593441 | 1.198258  | 3.091102  | H | -1.198258 | 3.593441  | -3.091102 |
| C | -0.674356 | -3.330151 | -2.173844 | H | -3.593441 | -1.198258 | 3.091102  | H | 1.198258  | 3.593441  | -3.091102 |
| C | 3.330151  | -0.674356 | 2.173844  | H | -2.718614 | 1.600789  | -2.345708 | H | 2.718614  | -1.600789 | -2.345708 |
| C | 3.330151  | 0.674356  | 2.173844  | H | -1.600789 | 2.718614  | 2.345708  | H | 1.600789  | -2.718614 | 2.345708  |

[6]N-belt E = -3561.91532987, H = -3560.706386

|   |           |           |           |   |           |           |           |   |           |            |           |
|---|-----------|-----------|-----------|---|-----------|-----------|-----------|---|-----------|------------|-----------|
| C | 1.202119  | 4.822237  | 0.298147  | C | 0.000000  | 9.717967  | 1.255899  | H | -1.720440 | -4.529000  | -2.347426 |
| C | 1.548579  | 4.594865  | -1.054406 | C | -1.199561 | 9.014140  | 1.143438  | H | -3.062009 | -3.754445  | -2.347426 |
| C | 2.024040  | 4.352751  | 1.319349  | C | -1.208530 | 7.637914  | 0.925649  | H | -7.240060 | -1.691886  | 0.838921  |
| C | 3.204980  | 3.638541  | 1.054406  | C | -7.218893 | 2.772339  | -0.925649 | H | -9.335000 | -2.908503  | 1.223137  |
| C | 3.575120  | 3.452184  | -0.298147 | C | -8.406255 | 3.468220  | -1.143438 | H | -9.344891 | -5.395275  | 1.425934  |
| C | 2.757573  | 3.929245  | -1.319349 | C | -8.416007 | 4.858984  | -1.255899 | H | -7.186337 | -6.630096  | 1.223137  |
| C | -4.639439 | -1.897489 | -2.166328 | C | -7.206694 | 5.545921  | -1.143438 | H | -5.085247 | -5.424133  | 0.838921  |
| C | -3.962993 | -3.069127 | -2.166328 | C | -6.010363 | 4.865575  | -0.925649 | H | -2.154813 | -7.116019  | -0.838921 |
| C | -3.204980 | -3.638541 | -1.054406 | C | -5.997489 | 3.462652  | -0.815662 | H | -2.148663 | -9.538598  | -1.223137 |
| C | -3.575120 | -3.452184 | 0.298147  | N | -4.785659 | 2.763001  | -0.624767 | H | 0.000000  | -10.790551 | -1.425934 |
| N | -4.785659 | -2.763001 | 0.624767  | C | -4.639439 | 1.897489  | 2.166328  | H | 2.148663  | -9.538598  | -1.223137 |
| C | -4.777240 | -1.370053 | 0.298147  | C | -3.962993 | 3.069127  | 2.166328  | H | 2.154813  | -7.116019  | -0.838921 |
| C | -4.753559 | -0.956324 | -1.054406 | C | 3.962993  | -3.069127 | -2.166328 | H | 1.177052  | -5.147030  | 3.115878  |
| C | -4.781613 | -0.423506 | 1.319349  | C | 4.639439  | -1.897489 | -2.166328 | H | -1.177052 | -5.147030  | 3.115878  |
| C | -4.753559 | 0.956324  | 1.054406  | C | 4.753559  | -0.956324 | -1.054406 | H | 1.177052  | 5.147030   | -3.115878 |
| C | -4.777240 | 1.370053  | -0.298147 | C | 4.777240  | -1.370053 | 0.298147  | H | -1.177052 | 5.147030   | -3.115878 |
| C | -4.781613 | 0.423506  | -1.319349 | N | 4.785659  | -2.763001 | 0.624767  | H | -3.062009 | 3.754445   | -2.347426 |
| C | -2.024040 | -4.352751 | -1.319349 | C | 3.575120  | -3.452184 | 0.298147  | H | -1.720440 | 4.529000   | 2.347426  |
| C | -1.202119 | -4.822237 | -0.298147 | C | 3.204980  | -3.638541 | -1.054406 | H | 2.154813  | 7.116019   | 0.838921  |
| C | -1.548579 | -4.594865 | 1.054406  | C | 2.757573  | -3.929245 | 1.319349  | H | 2.148663  | 9.538598   | 1.223137  |
| C | -2.757573 | -3.929245 | 1.319349  | C | 1.548579  | -4.594865 | 1.054406  | H | 0.000000  | 10.790551  | 1.425934  |
| C | -5.997489 | -3.462652 | 0.815662  | C | 1.202119  | -4.822237 | -0.298147 | H | -2.148663 | 9.538598   | 1.223137  |
| C | -7.218893 | -2.772339 | 0.925649  | C | 2.024040  | -4.352751 | -1.319349 | H | -2.154813 | 7.116019   | 0.838921  |
| C | -8.406255 | -3.468220 | 1.143438  | C | 4.781613  | 0.423506  | -1.319349 | H | -7.240060 | 1.691886   | -0.838921 |
| C | -8.416007 | -4.858984 | 1.255899  | C | 4.777240  | 1.370053  | -0.298147 | H | -9.335000 | 2.908503   | -1.223137 |
| C | -7.206694 | -5.545921 | 1.143438  | C | 4.753559  | 0.956324  | 1.054406  | H | -9.344891 | 5.395275   | -1.425934 |
| C | -6.010363 | -4.865575 | 0.925649  | C | 4.781613  | -0.423506 | 1.319349  | H | -7.186337 | 6.630096   | -1.223137 |
| C | -1.208530 | -7.637914 | -0.925649 | C | 5.997489  | -3.462652 | 0.815662  | H | -5.085247 | 5.424133   | -0.838921 |
| C | -1.199561 | -9.014140 | -1.143438 | C | 7.218893  | -2.772339 | 0.925649  | H | -5.045985 | 1.554158   | 3.115878  |
| C | 0.000000  | -9.717967 | -1.255899 | C | 8.406255  | -3.468220 | 1.143438  | H | -3.868933 | 3.592872   | 3.115878  |

|   |           |           |           |   |           |           |           |   |          |           |           |
|---|-----------|-----------|-----------|---|-----------|-----------|-----------|---|----------|-----------|-----------|
| C | 1.199561  | -9.014140 | -1.143438 | C | 8.416007  | -4.858984 | 1.255899  | H | 3.868933 | -3.592872 | -3.115878 |
| C | 1.208530  | -7.637914 | -0.925649 | C | 7.206694  | -5.545921 | 1.143438  | H | 5.045985 | -1.554158 | -3.115878 |
| C | 0.000000  | -6.925304 | -0.815662 | C | 6.010363  | -4.865575 | 0.925649  | H | 3.062009 | -3.754445 | 2.347426  |
| N | 0.000000  | -5.526003 | -0.624767 | C | 6.010363  | 4.865575  | -0.925649 | H | 1.720440 | -4.529000 | -2.347426 |
| C | 0.676445  | -4.966616 | 2.166328  | C | 7.206694  | 5.545921  | -1.143438 | H | 4.782449 | 0.774555  | -2.347426 |
| C | -0.676445 | -4.966616 | 2.166328  | C | 8.416007  | 4.858984  | -1.255899 | H | 4.782449 | -0.774555 | 2.347426  |
| C | 0.676445  | 4.966616  | -2.166328 | C | 8.406255  | 3.468220  | -1.143438 | H | 7.240060 | -1.691886 | 0.838921  |
| C | -0.676445 | 4.966616  | -2.166328 | C | 7.218893  | 2.772339  | -0.925649 | H | 9.335000 | -2.908503 | 1.223137  |
| C | -1.548579 | 4.594865  | -1.054406 | C | 5.997489  | 3.462652  | -0.815662 | H | 9.344891 | -5.395275 | 1.425934  |
| C | -1.202119 | 4.822237  | 0.298147  | N | 4.785659  | 2.763001  | -0.624767 | H | 7.186337 | -6.630096 | 1.223137  |
| N | 0.000000  | 5.526003  | 0.624767  | C | 3.962993  | 3.069127  | 2.166328  | H | 5.085247 | -5.424133 | 0.838921  |
| C | -2.757573 | 3.929245  | -1.319349 | C | 4.639439  | 1.897489  | 2.166328  | H | 5.085247 | 5.424133  | -0.838921 |
| C | -3.575120 | 3.452184  | -0.298147 | H | 1.720440  | 4.529000  | 2.347426  | H | 7.186337 | 6.630096  | -1.223137 |
| C | -3.204980 | 3.638541  | 1.054406  | H | 3.062009  | 3.754445  | -2.347426 | H | 9.344891 | 5.395275  | -1.425934 |
| C | -2.024040 | 4.352751  | 1.319349  | H | -5.045985 | -1.554158 | -3.115878 | H | 9.335000 | 2.908503  | -1.223137 |
| C | 0.000000  | 6.925304  | 0.815662  | H | -3.868933 | -3.592872 | -3.115878 | H | 7.240060 | 1.691886  | -0.838921 |
| C | 1.208530  | 7.637914  | 0.925649  | H | -4.782449 | -0.774555 | 2.347426  | H | 3.868933 | 3.592872  | 3.115878  |
| C | 1.199561  | 9.014140  | 1.143438  | H | -4.782449 | 0.774555  | -2.347426 | H | 5.045985 | 1.554158  | 3.115878  |

[8]N-belt E = -4749.22439494, H = -4747.610812

|   |            |           |           |   |           |            |           |   |            |            |           |
|---|------------|-----------|-----------|---|-----------|------------|-----------|---|------------|------------|-----------|
| C | 1.215866   | 6.513821  | 0.307434  | C | 6.316777  | -1.570750  | -1.048365 | H | -8.774776  | 2.155896   | 0.932060  |
| C | 1.570750   | 6.316777  | -1.048365 | C | 6.118094  | -2.086049  | 1.319097  | H | -11.175173 | 2.148341   | 1.405051  |
| C | 2.086049   | 6.118094  | 1.319097  | C | 5.577324  | -3.355948  | 1.048365  | H | -12.420451 | 0.000000   | 1.656572  |
| C | 3.355948   | 5.577324  | 1.048365  | C | 5.465714  | -3.746219  | -0.307434 | H | -11.175173 | -2.148341  | 1.405051  |
| C | 3.746219   | 5.465714  | -0.307434 | C | 5.801205  | -2.851086  | -1.319097 | H | -8.774776  | -2.155896  | 0.932060  |
| C | 2.851086   | 5.801205  | -1.319097 | C | 8.576585  | 0.000000   | 0.902931  | H | -7.729152  | -4.680255  | -0.932060 |
| C | -6.617992  | 0.677055  | -2.159946 | C | 9.287807  | -1.207459  | 1.038208  | H | -9.421147  | -6.382934  | -1.405051 |
| C | -6.617992  | -0.677055 | -2.159946 | C | 10.655153 | -1.198542  | 1.306923  | H | -8.782585  | -8.782585  | -1.656572 |
| C | -6.316777  | -1.570750 | -1.048365 | C | 11.355038 | 0.000000   | 1.446285  | H | -6.382934  | -9.421147  | -1.405051 |
| C | -6.513821  | -1.215866 | 0.307434  | C | 10.655153 | 1.198542   | 1.306923  | H | -4.680255  | -7.729152  | -0.932060 |
| N | -7.181509  | 0.000000  | 0.652099  | C | 9.287807  | 1.207459   | 1.038208  | H | -3.954716  | -5.607767  | 3.120274  |
| C | -6.513821  | 1.215866  | 0.307434  | C | -0.677055 | -6.617992  | -2.159946 | H | -5.607767  | -3.954716  | 3.120274  |
| C | -6.316777  | 1.570750  | -1.048365 | C | 0.677055  | -6.617992  | -2.159946 | H | 1.168884   | 6.761696   | -3.120274 |
| C | -6.118094  | 2.086049  | 1.319097  | C | 1.570750  | -6.316777  | -1.048365 | H | -1.168884  | 6.761696   | -3.120274 |
| C | -5.577324  | 3.355948  | 1.048365  | C | 1.215866  | -6.513821  | 0.307434  | H | -3.173620  | 5.684120   | -2.349865 |
| C | -5.465714  | 3.746219  | -0.307434 | N | 0.000000  | -7.181509  | 0.652099  | H | -1.775192  | 6.263368   | 2.349865  |
| C | -5.801205  | 2.851086  | -1.319097 | C | -1.215866 | -6.513821  | 0.307434  | H | 2.155896   | 8.774776   | 0.932060  |
| C | -5.801205  | -2.851086 | -1.319097 | C | -1.570750 | -6.316777  | -1.048365 | H | 2.148341   | 11.175173  | 1.405051  |
| C | -5.465714  | -3.746219 | -0.307434 | C | -2.086049 | -6.118094  | 1.319097  | H | 0.000000   | 12.420451  | 1.656572  |
| C | -5.577324  | -3.355948 | 1.048365  | C | -3.355948 | -5.577324  | 1.048365  | H | -2.148341  | 11.175173  | 1.405051  |
| C | -6.118094  | -2.086049 | 1.319097  | C | -3.746219 | -5.465714  | -0.307434 | H | -2.155896  | 8.774776   | 0.932060  |
| C | -8.576585  | 0.000000  | 0.902931  | C | -2.851086 | -5.801205  | -1.319097 | H | -7.729152  | 4.680255   | -0.932060 |
| C | -9.287807  | 1.207459  | 1.038208  | C | 2.851086  | -5.801205  | -1.319097 | H | -9.421147  | 6.382934   | -1.405051 |
| C | -10.655153 | 1.198542  | 1.306923  | C | 3.746219  | -5.465714  | -0.307434 | H | -8.782585  | 8.782585   | -1.656572 |
| C | -11.355038 | 0.000000  | 1.446285  | C | 3.355948  | -5.577324  | 1.048365  | H | -6.382934  | 9.421147   | -1.405051 |
| C | -10.655153 | -1.198542 | 1.306923  | C | 2.086049  | -6.118094  | 1.319097  | H | -4.680255  | 7.729152   | -0.932060 |
| C | -9.287807  | -1.207459 | 1.038208  | C | 0.000000  | -8.576585  | 0.902931  | H | -5.607767  | 3.954716   | 3.120274  |
| C | -7.421274  | -5.713669 | -1.038208 | C | 1.207459  | -9.287807  | 1.038208  | H | -3.954716  | 5.607767   | 3.120274  |
| C | -8.381828  | -6.686834 | -1.306923 | C | 1.198542  | -10.655153 | 1.306923  | H | 6.761696   | -1.168884  | -3.120274 |
| C | -8.029225  | -8.029225 | -1.446285 | C | 0.000000  | -11.355038 | 1.446285  | H | 6.761696   | 1.168884   | -3.120274 |
| C | -6.686834  | -8.381828 | -1.306923 | C | -1.198542 | -10.655153 | 1.306923  | H | 6.263368   | -1.775192  | 2.349865  |
| C | -5.713669  | -7.421274 | -1.038208 | C | -1.207459 | -9.287807  | 1.038208  | H | 5.684120   | -3.173620  | -2.349865 |
| C | -6.064561  | -6.064561 | -0.902931 | C | 7.421274  | -5.713669  | -1.038208 | H | 8.774776   | -2.155896  | 0.932060  |
| N | -5.078093  | -5.078093 | -0.652099 | C | 8.381828  | -6.686834  | -1.306923 | H | 11.175173  | -2.148341  | 1.405051  |
| C | -4.200877  | -5.158378 | 2.159946  | C | 8.029225  | -8.029225  | -1.446285 | H | 12.420451  | 0.000000   | 1.656572  |
| C | -5.158378  | -4.200877 | 2.159946  | C | 6.686834  | -8.381828  | -1.306923 | H | 11.175173  | 2.148341   | 1.405051  |
| C | 0.677055   | 6.617992  | -2.159946 | C | 5.713669  | -7.421274  | -1.038208 | H | 8.774776   | 2.155896   | 0.932060  |
| C | -0.677055  | 6.617992  | -2.159946 | C | 6.064561  | -6.064561  | -0.902931 | H | -1.168884  | -6.761696  | -3.120274 |
| C | -1.570750  | 6.316777  | -1.048365 | N | 5.078093  | -5.078093  | -0.652099 | H | 1.168884   | -6.761696  | -3.120274 |
| C | -1.215866  | 6.513821  | 0.307434  | C | 5.158378  | -4.200877  | 2.159946  | H | -1.775192  | -6.263368  | 2.349865  |
| N | 0.000000   | 7.181509  | 0.652099  | C | 4.200877  | -5.158378  | 2.159946  | H | -3.173620  | -5.684120  | -2.349865 |
| C | -2.851086  | 5.801205  | -1.319097 | C | 6.316777  | 1.570750   | -1.048365 | H | 3.173620   | -5.684120  | -2.349865 |
| C | -3.746219  | 5.465714  | -0.307434 | C | 6.513821  | 1.215866   | 0.307434  | H | 1.775192   | -6.263368  | 2.349865  |
| C | -3.355948  | 5.577324  | 1.048365  | C | 5.801205  | 2.851086   | -1.319097 | H | 2.155896   | -8.774776  | 0.932060  |
| C | -2.086049  | 6.118094  | 1.319097  | C | 5.465714  | 3.746219   | -0.307434 | H | 2.148341   | -11.175173 | 1.405051  |
| C | 0.000000   | 8.576585  | 0.902931  | C | 5.577324  | 3.355948   | 1.048365  | H | 0.000000   | -12.420451 | 1.656572  |
| C | 1.207459   | 9.287807  | 1.038208  | C | 6.118094  | 2.086049   | 1.319097  | H | -2.148341  | -11.175173 | 1.405051  |
| C | 1.198542   | 10.655153 | 1.306923  | C | 5.713669  | 7.421274   | -1.038208 | H | -2.155896  | -8.774776  | 0.932060  |
| C | 0.000000   | 11.355038 | 1.446285  | C | 6.686834  | 8.381828   | -1.306923 | H | 7.729152   | -4.680255  | -0.932060 |

|   |           |           |           |   |           |           |           |   |          |           |           |
|---|-----------|-----------|-----------|---|-----------|-----------|-----------|---|----------|-----------|-----------|
| C | -1.198542 | 10.655153 | 1.306923  | C | 8.029225  | 8.029225  | -1.446285 | H | 9.421147 | -6.382934 | -1.405051 |
| C | -1.207459 | 9.287807  | 1.038208  | C | 8.381828  | 6.686834  | -1.306923 | H | 8.782585 | -8.782585 | -1.656572 |
| C | -7.421274 | 5.713669  | -1.038208 | C | 7.421274  | 5.713669  | -1.038208 | H | 6.382934 | -9.421147 | -1.405051 |
| C | -8.381828 | 6.686834  | -1.306923 | C | 6.064561  | 6.064561  | -0.902931 | H | 4.680255 | -7.729152 | -0.932060 |
| C | -8.029225 | 8.029225  | -1.446285 | N | 5.078093  | 5.078093  | -0.652099 | H | 5.607767 | -3.954716 | 3.120274  |
| C | -6.686834 | 8.381828  | -1.306923 | C | 4.200877  | 5.158378  | 2.159946  | H | 3.954716 | -5.607767 | 3.120274  |
| C | -5.713669 | 7.421274  | -1.038208 | C | 5.158378  | 4.200877  | 2.159946  | H | 5.684120 | 3.173620  | -2.349865 |
| C | -6.064561 | 6.064561  | -0.902931 | H | 1.775192  | 6.263368  | 2.349865  | H | 6.263368 | 1.775192  | 2.349865  |
| N | -5.078093 | 5.078093  | -0.652099 | H | 3.173620  | 5.684120  | -2.349865 | H | 4.680255 | 7.729152  | -0.932060 |
| C | -5.158378 | 4.200877  | 2.159946  | H | -6.761696 | 1.168884  | -3.120274 | H | 6.382934 | 9.421147  | -1.405051 |
| C | -4.200877 | 5.158378  | 2.159946  | H | -6.761696 | -1.168884 | -3.120274 | H | 8.782585 | 8.782585  | -1.656572 |
| C | 6.617992  | -0.677055 | -2.159946 | H | -6.263368 | 1.775192  | 2.349865  | H | 9.421147 | 6.382934  | -1.405051 |
| C | 6.617992  | 0.677055  | -2.159946 | H | -5.684120 | 3.173620  | -2.349865 | H | 7.729152 | 4.680255  | -0.932060 |
| N | 7.181509  | 0.000000  | 0.652099  | H | -5.684120 | -3.173620 | -2.349865 | H | 3.954716 | 5.607767  | 3.120274  |
| C | 6.513821  | -1.215866 | 0.307434  | H | -6.263368 | -1.775192 | 2.349865  | H | 5.607767 | 3.954716  | 3.120274  |

[10]N-belt E = -5936.51782754, H = -5934.499792

|   |           |           |           |   |            |            |           |   |           |            |           |
|---|-----------|-----------|-----------|---|------------|------------|-----------|---|-----------|------------|-----------|
| C | -1.223383 | 8.194358  | 0.312046  | C | 5.806261   | -5.910289  | 0.312046  | H | 13.403245 | 4.354978   | 1.643344  |
| C | -1.582282 | 8.012997  | -1.045322 | C | 5.990015   | -5.552608  | -1.045322 | H | 12.880067 | 1.926265   | 1.399811  |
| C | -2.118410 | 7.844548  | 1.318515  | C | 6.324739   | -5.101202  | 1.318515  | H | 10.600511 | 1.176673   | 0.943644  |
| C | -3.429828 | 7.412693  | 1.045322  | C | 7.131861   | -3.980992  | 1.045322  | H | 10.600511 | -1.176673  | -0.943644 |
| C | -3.826785 | 7.348462  | -0.312046 | C | 7.415252   | -3.695702  | -0.312046 | H | 12.880067 | -1.926265  | -1.399811 |
| C | -2.897080 | 7.591542  | -1.318515 | C | 6.805984   | -4.438826  | -1.318515 | H | 13.403245 | -4.354978  | -1.643344 |
| C | 7.652534  | 3.198729  | -2.157403 | C | 2.118410   | -7.844548  | -1.318515 | H | 11.552423 | -6.012332  | -1.399811 |
| C | 8.071196  | 1.910220  | -2.157403 | C | 1.223383   | -8.194358  | -0.312046 | H | 9.267624  | -5.278875  | -0.943644 |
| C | 8.109765  | 0.971312  | -1.045322 | C | 1.582282   | -8.012997  | 1.045322  | H | 7.614754  | -3.698714  | 3.123479  |
| C | 8.171344  | 1.368690  | 0.312046  | C | 2.897080   | -7.591542  | 1.318515  | H | 8.334515  | -1.483518  | 3.123479  |
| N | 8.409254  | 2.732332  | 0.668035  | C | 6.020375   | -8.286336  | 0.912790  | H | -1.164597 | 8.385027   | -3.123479 |
| C | 7.415252  | 3.695702  | 0.312046  | C | 5.463472   | -9.572992  | 1.044077  | H | 1.164597  | 8.385027   | -3.123479 |
| C | 7.131861  | 3.980992  | -1.045322 | C | 6.275381   | -10.675418 | 1.304479  | H | 3.226268  | 7.508628   | -2.350508 |
| C | 6.805984  | 4.438826  | 1.318515  | C | 7.656686   | -10.538524 | 1.439512  | H | 1.803355  | 7.970961   | 2.350508  |
| C | 5.990015  | 5.552608  | 1.045322  | C | 8.213727   | -9.267128  | 1.304479  | H | -2.156655 | 10.445297  | 0.943644  |
| C | 5.806261  | 5.910289  | -0.312046 | C | 7.416151   | -8.154288  | 1.044077  | H | -2.148172 | 12.844920  | 1.399811  |
| C | 6.324739  | 5.101202  | -1.318515 | C | -1.206822  | -10.956062 | -1.044077 | H | 0.000000  | 14.093006  | 1.643344  |
| C | 8.115233  | -0.409371 | -1.318515 | C | -1.197963  | -12.325172 | -1.304479 | H | 2.148172  | 12.844920  | 1.399811  |
| C | 8.171344  | -1.368690 | -0.312046 | C | 0.000000   | -13.026332 | -1.439512 | H | 2.156655  | 10.445297  | 0.943644  |
| C | 8.109765  | -0.971312 | 1.045322  | C | 1.197963   | -12.325172 | -1.304479 | H | 7.884362  | 7.182772   | -0.943644 |
| C | 8.115233  | 0.409371  | 1.318515  | C | 1.206822   | -10.956062 | -1.044077 | H | 9.287963  | 9.129095   | -1.399811 |
| C | 9.741172  | 3.165099  | 0.912790  | C | 0.000000   | -10.242474 | -0.912790 | H | 8.283661  | 11.401481  | -1.643344 |
| C | 10.046905 | 4.533365  | 1.044077  | N | 0.000000   | -8.842012  | -0.668035 | H | 5.812147  | 11.654423  | -1.399811 |
| C | 11.351744 | 4.948018  | 1.304479  | C | -0.677409  | -8.266454  | 2.157403  | H | 4.394821  | 9.718073   | -0.943644 |
| C | 12.388778 | 4.025358  | 1.439512  | C | 0.677409   | -8.266454  | 2.157403  | H | 5.870774  | 6.099096   | 3.123479  |
| C | 12.092126 | 2.669357  | 1.304479  | C | -8.071196  | 1.910220   | -2.157403 | H | 3.986416  | 7.468162   | 3.123479  |
| C | 10.792762 | 2.237854  | 1.044077  | C | -7.652534  | 3.198729   | -2.157403 | H | -3.986416 | -7.468162  | -3.123479 |
| C | 10.792762 | -2.237854 | -1.044077 | C | -7.131861  | 3.980992   | -1.045322 | H | -5.870774 | -6.099096  | -3.123479 |
| C | 12.092126 | -2.669357 | -1.304479 | C | -7.415252  | 3.695702   | 0.312046  | H | -3.226268 | -7.508628  | 2.350508  |
| C | 12.388778 | -4.025358 | -1.439512 | N | -8.409254  | 2.732332   | 0.668035  | H | -1.803355 | -7.970961  | -2.350508 |
| C | 11.351744 | -4.948018 | -1.304479 | C | -8.171344  | 1.368690   | 0.312046  | H | -4.394821 | -9.718073  | 0.943644  |
| C | 10.046905 | -4.533365 | -1.044077 | C | -8.109765  | 0.971312   | -1.045322 | H | -5.812147 | -11.654423 | 1.399811  |
| C | 9.741172  | -3.165099 | -0.912790 | C | -8.115233  | 0.409371   | 1.318515  | H | -8.283661 | -11.401481 | 1.643344  |
| N | 8.409254  | -2.732332 | -0.668035 | C | -8.109765  | -0.971312  | 1.045322  | H | -9.287963 | -9.129095  | 1.399811  |
| C | 7.652534  | -3.198729 | 2.157403  | C | -8.171344  | -1.368690  | -0.312046 | H | -7.884362 | -7.182772  | 0.943644  |
| C | 8.071196  | -1.910220 | 2.157403  | C | -8.115233  | -0.409371  | -1.318515 | H | 5.870774  | -6.099096  | -3.123479 |
| C | -0.677409 | 8.266454  | -2.157403 | C | -6.324739  | 5.101202   | -1.318515 | H | 3.986416  | -7.468162  | -3.123479 |
| C | 0.677409  | 8.266454  | -2.157403 | C | -5.806261  | 5.910289   | -0.312046 | H | 6.144158  | -5.388657  | -2.350508 |
| C | 1.582282  | 8.012997  | -1.045322 | C | -5.990015  | 5.552608   | 1.045322  | H | 7.023567  | -4.178255  | -2.350508 |
| C | 1.223383  | 8.194358  | 0.312046  | C | -6.805984  | 4.438826   | 1.318515  | H | 1.803355  | -7.970961  | -2.350508 |
| N | 0.000000  | 8.842012  | 0.668035  | C | -9.741172  | 3.165099   | 0.912790  | H | 3.226268  | -7.508628  | 2.350508  |
| C | 2.897080  | 7.591542  | -1.318515 | C | -10.792762 | 2.237854   | 1.044077  | H | 4.394821  | -9.718073  | 0.943644  |
| C | 3.826785  | 7.348462  | -0.312046 | C | -12.092126 | 2.669357   | 1.304479  | H | 5.812147  | -11.654423 | 1.399811  |
| C | 3.429828  | 7.412693  | 1.045322  | C | -12.388778 | 4.025358   | 1.439512  | H | 8.283661  | -11.401481 | 1.643344  |
| C | 2.118410  | 7.844548  | 1.318515  | C | -11.351744 | 4.948018   | 1.304479  | H | 9.287963  | -9.129095  | 1.399811  |
| C | 0.000000  | 10.242474 | 0.912790  | C | -10.046905 | 4.533365   | 1.044077  | H | 7.884362  | -7.182772  | 0.943644  |
| C | -1.206822 | 10.956062 | 1.044077  | C | -5.463472  | 9.572992   | -1.044077 | H | -2.156655 | -10.445297 | -0.943644 |
| C | -1.197963 | 12.325172 | 1.304479  | C | -6.275381  | 10.675418  | -1.304479 | H | -2.148172 | -12.844920 | -1.399811 |
| C | 0.000000  | 13.026332 | 1.439512  | C | -7.656686  | 10.538524  | -1.439512 | H | 0.000000  | -14.093006 | -1.643344 |
| C | 1.197963  | 12.325172 | 1.304479  | C | -8.213727  | 9.267128   | -1.304479 | H | 2.148172  | -12.844920 | -1.399811 |
| C | 1.206822  | 10.956062 | 1.044077  | C | -7.416151  | 8.154288   | -1.044077 | H | 2.156655  | -10.445297 | -0.943644 |
| C | 7.416151  | 8.154288  | -1.044077 | C | -6.020375  | 8.286336   | -0.912790 | H | -1.164597 | -8.385027  | 3.123479  |

|   |           |            |           |   |            |           |           |   |            |           |           |
|---|-----------|------------|-----------|---|------------|-----------|-----------|---|------------|-----------|-----------|
| C | 8.213727  | 9.267128   | -1.304479 | N | -5.197204  | 7.153338  | -0.668035 | H | 1.164597   | -8.385027 | 3.123479  |
| C | 7.656686  | 10.538524  | -1.439512 | C | -4.310864  | 7.085873  | 2.157403  | H | -8.334515  | 1.483518  | -3.123479 |
| C | 6.275381  | 10.675418  | -1.304479 | C | -5.406935  | 6.289530  | 2.157403  | H | -7.614754  | 3.698714  | -3.123479 |
| C | 5.463472  | 9.572992   | -1.044077 | C | -5.990015  | -5.552608 | -1.045322 | H | -8.138101  | 0.748070  | 2.350508  |
| C | 6.020375  | 8.286336   | -0.912790 | C | -5.806261  | -5.910289 | 0.312046  | H | -8.138101  | -0.748070 | -2.350508 |
| N | 5.197204  | 7.153338   | -0.668035 | C | -6.805984  | -4.438826 | -1.318515 | H | -6.144158  | 5.388657  | -2.350508 |
| C | 5.406935  | 6.289530   | 2.157403  | C | -7.415252  | -3.695702 | -0.312046 | H | -7.023567  | 4.178255  | 2.350508  |
| C | 4.310864  | 7.085873   | 2.157403  | C | -7.131861  | -3.980992 | 1.045322  | H | -10.600511 | 1.176673  | 0.943644  |
| C | -4.310864 | -7.085873  | -2.157403 | C | -6.324739  | -5.101202 | 1.318515  | H | -12.880067 | 1.926265  | 1.399811  |
| C | -5.406935 | -6.289530  | -2.157403 | C | -10.792762 | -2.237854 | -1.044077 | H | -13.403245 | 4.354978  | 1.643344  |
| N | -5.197204 | -7.153338  | 0.668035  | C | -12.092126 | -2.669357 | -1.304479 | H | -11.552423 | 6.012332  | 1.399811  |
| C | -3.826785 | -7.348462  | 0.312046  | C | -12.388778 | -4.025358 | -1.439512 | H | -9.267624  | 5.278875  | 0.943644  |
| C | -3.429828 | -7.412693  | -1.045322 | C | -11.351744 | -4.948018 | -1.304479 | H | -4.394821  | 9.718073  | -0.943644 |
| C | -2.897080 | -7.591542  | 1.318515  | C | -10.046905 | -4.533365 | -1.044077 | H | -5.812147  | 11.654423 | -1.399811 |
| C | -1.582282 | -8.012997  | 1.045322  | C | -9.741172  | -3.165099 | -0.912790 | H | -8.283661  | 11.401481 | -1.643344 |
| C | -1.223383 | -8.194358  | -0.312046 | N | -8.409254  | -2.732332 | -0.668035 | H | -9.287963  | 9.129095  | -1.399811 |
| C | -2.118410 | -7.844548  | -1.318515 | C | -8.071196  | -1.910220 | 2.157403  | H | -7.884362  | 7.182772  | -0.943644 |
| C | -6.020375 | -8.286336  | 0.912790  | C | -7.652534  | -3.198729 | 2.157403  | H | -3.986416  | 7.468162  | 3.123479  |
| C | -5.463472 | -9.572992  | 1.044077  | H | -1.803355  | 7.970961  | 2.350508  | H | -5.870774  | 6.099096  | 3.123479  |
| C | -6.275381 | -10.675418 | 1.304479  | H | -3.226268  | 7.508628  | -2.350508 | H | -7.023567  | -4.178255 | -2.350508 |
| C | -7.656686 | -10.538524 | 1.439512  | H | 7.614754   | 3.698714  | -3.123479 | H | -6.144158  | -5.388657 | 2.350508  |
| C | -8.213727 | -9.267128  | 1.304479  | H | 8.334515   | 1.483518  | -3.123479 | H | -10.600511 | -1.176673 | -0.943644 |
| C | -7.416151 | -8.154288  | 1.044077  | H | 7.023567   | 4.178255  | 2.350508  | H | -12.880067 | -1.926265 | -1.399811 |
| C | 5.406935  | -6.289530  | -2.157403 | H | 6.144158   | 5.388657  | -2.350508 | H | -13.403245 | -4.354978 | -1.643344 |
| C | 4.310864  | -7.085873  | -2.157403 | H | 8.138101   | -0.748070 | -2.350508 | H | -11.552423 | -6.012332 | -1.399811 |
| C | 3.429828  | -7.412693  | -1.045322 | H | 8.138101   | 0.748070  | 2.350508  | H | -9.267624  | -5.278875 | -0.943644 |
| C | 3.826785  | -7.348462  | 0.312046  | H | 9.267624   | 5.278875  | 0.943644  | H | -8.334515  | -1.483518 | 3.123479  |
| N | 5.197204  | -7.153338  | 0.668035  | H | 11.552423  | 6.012332  | 1.399811  | H | -7.614754  | -3.698714 | 3.123479  |

[12]N-belt E = -7123.80345370, H = -7121.380942

|   |            |           |           |   |            |            |           |   |            |            |           |
|---|------------|-----------|-----------|---|------------|------------|-----------|---|------------|------------|-----------|
| C | 1.228173   | 9.868754  | 0.314942  | C | -8.926502  | -4.371240  | -2.155711 | H | -11.571097 | 4.189463   | 0.943648  |
| C | 1.589231   | 9.696793  | -1.043363 | C | -8.248856  | -5.544958  | -2.155711 | H | -12.115595 | 2.157367   | -0.943648 |
| C | 2.138076   | 9.549920  | 1.318081  | C | -7.603054  | -6.224711  | -1.043363 | H | -14.515999 | 2.148093   | -1.378016 |
| C | 3.472082   | 9.192284  | 1.043363  | C | -7.932505  | -5.998006  | 0.314942  | H | -15.767139 | 0.000000   | -1.610716 |
| C | 3.870748   | 9.160678  | -0.314942 | N | -9.096444  | -5.251835  | 0.678073  | H | -14.515999 | -2.148093  | -1.378016 |
| C | 2.923332   | 9.339511  | -1.318081 | C | -9.160678  | -3.870748  | 0.314942  | H | -12.115595 | -2.157367  | -0.943648 |
| C | -8.248856  | 5.544958  | -2.155711 | C | -9.192284  | -3.472082  | -1.043363 | H | -10.016492 | -1.161940  | 3.125281  |
| C | -8.926502  | 4.371240  | -2.155711 | C | -9.339511  | -2.923332  | 1.318081  | H | -10.016492 | 1.161940   | 3.125281  |
| C | -9.192284  | 3.472082  | -1.043363 | C | -9.696793  | -1.589231  | 1.043363  | H | 1.161940   | 10.016492  | -3.125281 |
| C | -9.160678  | 3.870748  | 0.314942  | C | -9.868754  | -1.228173  | -0.314942 | H | -1.161940  | 10.016492  | -3.125281 |
| N | -9.096444  | 5.251835  | 0.678073  | C | -9.549920  | -2.138076  | -1.318081 | H | -3.255115  | 9.279495   | -2.350838 |
| C | -7.932505  | 5.998006  | 0.314942  | C | -6.626588  | -7.201436  | -1.318081 | H | -1.820735  | 9.663836   | 2.350838  |
| C | -7.603054  | 6.224711  | -1.043363 | C | -5.998006  | -7.932505  | -0.314942 | H | 2.157367   | 12.115595  | 0.943648  |
| C | -7.201436  | 6.626588  | 1.318081  | C | -6.224711  | -7.603054  | 1.043363  | H | 2.148093   | 14.515999  | 1.378016  |
| C | -6.224711  | 7.603054  | 1.043363  | C | -7.201436  | -6.626588  | 1.318081  | H | 0.000000   | 15.767139  | 1.610716  |
| C | -5.998006  | 7.932505  | -0.314942 | C | -10.313471 | -5.954485  | 0.912503  | H | -2.148093  | 14.515999  | 1.378016  |
| C | -6.626588  | 7.201436  | -1.318081 | C | -10.330201 | -7.357150  | 1.037923  | H | -2.157367  | 12.115595  | 0.943648  |
| C | -9.549920  | 2.138076  | -1.318081 | C | -11.522275 | -8.035186  | 1.286786  | H | -7.926132  | 9.413729   | -0.943648 |
| C | -9.868754  | 1.228173  | -0.314942 | C | -12.729521 | -7.349392  | 1.415861  | H | -9.118302  | 11.497177  | -1.378016 |
| C | -9.696793  | 1.589231  | 1.043363  | C | -12.719813 | -5.960990  | 1.286786  | H | -7.883569  | 13.654743  | -1.610716 |
| C | -9.339511  | 2.923332  | 1.318081  | C | -11.536579 | -5.267641  | 1.037923  | H | -5.397696  | 13.645270  | -1.378016 |
| C | -10.313471 | 5.954485  | 0.912503  | C | -5.267641  | -11.536579 | -1.037923 | H | -4.189463  | 11.571097  | -0.943648 |
| C | -10.330201 | 7.357150  | 1.037923  | C | -5.960990  | -12.719813 | -1.286786 | H | -6.014516  | 8.093566   | 3.125281  |
| C | -11.522275 | 8.035186  | 1.286786  | C | -7.349392  | -12.729521 | -1.415861 | H | -4.001976  | 9.255507   | 3.125281  |
| C | -12.729521 | 7.349392  | 1.415861  | C | -8.035186  | -11.522275 | -1.286786 | H | -1.161940  | -10.016492 | -3.125281 |
| C | -12.719813 | 5.960990  | 1.286786  | C | -7.357150  | -10.330201 | -1.037923 | H | 1.161940   | -10.016492 | -3.125281 |
| C | -11.536579 | 5.267641  | 1.037923  | C | -5.954485  | -10.313471 | -0.912503 | H | -1.820735  | -9.663836  | 2.350838  |
| C | -12.624791 | 1.206379  | -1.037923 | N | -5.251835  | -9.096444  | -0.678073 | H | -3.255115  | -9.279495  | -2.350838 |
| C | -13.996176 | 1.197538  | -1.286786 | C | -4.371240  | -8.926502  | 2.155711  | H | 3.255115   | -9.279495  | -2.350838 |
| C | -14.698785 | 0.000000  | -1.415861 | C | -5.544958  | -8.248856  | 2.155711  | H | 1.820735   | -9.663836  | 2.350838  |
| C | -13.996176 | -1.197538 | -1.286786 | C | 8.926502   | 4.371240   | -2.155711 | H | -2.157367  | -12.115595 | 0.943648  |
| C | -12.624791 | -1.206379 | -1.037923 | C | 8.248856   | 5.544958   | -2.155711 | H | -2.148093  | -14.515999 | 1.378016  |
| C | -11.908970 | 0.000000  | -0.912503 | C | 7.603054   | 6.224711   | -1.043363 | H | 0.000000   | -15.767139 | 1.610716  |
| N | -10.503669 | 0.000000  | -0.678073 | C | 7.932505   | 5.998006   | 0.314942  | H | 2.148093   | -14.515999 | 1.378016  |
| C | -9.916198  | -0.677646 | 2.155711  | N | 9.096444   | 5.251835   | 0.678073  | H | 2.157367   | -12.115595 | 0.943648  |
| C | -9.916198  | 0.677646  | 2.155711  | C | 9.160678   | 3.870748   | 0.314942  | H | 7.926132   | -9.413729  | -0.943648 |
| C | 0.677646   | 9.916198  | -2.155711 | C | 9.192284   | 3.472082   | -1.043363 | H | 9.118302   | -11.497177 | -1.378016 |
| C | -0.677646  | 9.916198  | -2.155711 | C | 9.339511   | 2.923332   | 1.318081  | H | 7.883569   | -13.654743 | -1.610716 |
| C | -1.589231  | 9.696793  | -1.043363 | C | 9.696793   | 1.589231   | 1.043363  | H | 5.397696   | -13.645270 | -1.378016 |

|   |           |            |           |   |            |           |           |   |            |            |           |
|---|-----------|------------|-----------|---|------------|-----------|-----------|---|------------|------------|-----------|
| C | -1.228173 | 9.868754   | 0.314942  | C | 9.868754   | 1.228173  | -0.314942 | H | 4.189463   | -11.571097 | -0.943648 |
| N | 0.000000  | 10.503669  | 0.678073  | C | 9.549920   | 2.138076  | -1.318081 | H | 6.408721   | -7.458760  | -2.350838 |
| C | -2.923332 | 9.339511   | -1.318081 | C | 6.626588   | 7.201436  | -1.318081 | H | 7.458760   | -6.408721  | 2.350838  |
| C | -3.870748 | 9.160678   | -0.314942 | C | 5.998006   | 7.932505  | -0.314942 | H | 6.014516   | -8.093566  | 3.125281  |
| C | -3.472082 | 9.192284   | 1.043363  | C | 6.224711   | 7.603054  | 1.043363  | H | 4.001976   | -9.255507  | 3.125281  |
| C | -2.138076 | 9.549920   | 1.318081  | C | 7.201436   | 6.626588  | 1.318081  | H | -9.255507  | -4.001976  | -3.125281 |
| C | 0.000000  | 11.908970  | 0.912503  | C | 10.313471  | 5.954485  | 0.912503  | H | -8.093566  | -6.014516  | -3.125281 |
| C | 1.206379  | 12.624791  | 1.037923  | C | 11.536579  | 5.267641  | 1.037923  | H | -9.279495  | -3.255115  | 2.350838  |
| C | 1.197538  | 13.996176  | 1.286786  | C | 12.719813  | 5.960990  | 1.286786  | H | -9.663836  | -1.820735  | -2.350838 |
| C | 0.000000  | 14.698785  | 1.415861  | C | 12.729521  | 7.349392  | 1.415861  | H | -6.408721  | -7.458760  | -2.350838 |
| C | -1.197538 | 13.996176  | 1.286786  | C | 11.522275  | 8.035186  | 1.286786  | H | -7.458760  | -6.408721  | 2.350838  |
| C | -1.206379 | 12.624791  | 1.037923  | C | 10.330201  | 7.357150  | 1.037923  | H | -9.413729  | -7.926132  | 0.943648  |
| C | -7.357150 | 10.330201  | -1.037923 | C | 5.267641   | 11.536579 | -1.037923 | H | -11.497177 | -9.118302  | 1.378016  |
| C | -8.035186 | 11.522275  | -1.286786 | C | 5.960990   | 12.719813 | -1.286786 | H | -13.654743 | -7.883569  | 1.610716  |
| C | -7.349392 | 12.729521  | -1.415861 | C | 7.349392   | 12.729521 | -1.415861 | H | -13.645270 | -5.397696  | 1.378016  |
| C | -5.960990 | 12.719813  | -1.286786 | C | 8.035186   | 11.522275 | -1.286786 | H | -11.571097 | -4.189463  | 0.943648  |
| C | -5.267641 | 11.536579  | -1.037923 | C | 7.357150   | 10.330201 | -1.037923 | H | -4.189463  | -11.571097 | -0.943648 |
| C | -5.954485 | 10.313471  | -0.912503 | C | 5.954485   | 10.313471 | -0.912503 | H | -5.397696  | -13.645270 | -1.378016 |
| N | -5.251835 | 9.096444   | -0.678073 | N | 5.251835   | 9.096444  | -0.678073 | H | -7.883569  | -13.654743 | -1.610716 |
| C | -5.544958 | 8.248856   | 2.155711  | C | 4.371240   | 8.926502  | 2.155711  | H | -9.118302  | -11.497177 | -1.378016 |
| C | -4.371240 | 8.926502   | 2.155711  | C | 5.544958   | 8.248856  | 2.155711  | H | -7.926132  | -9.413729  | -0.943648 |
| C | -0.677646 | -9.916198  | -2.155711 | C | 8.248856   | -5.544958 | -2.155711 | H | -4.001976  | -9.255507  | -2.350838 |
| C | 0.677646  | -9.916198  | -2.155711 | C | 8.926502   | -4.371240 | -2.155711 | H | -6.014516  | -8.093566  | 3.125281  |
| C | 1.589231  | -9.696793  | -1.043363 | C | 9.192284   | -3.472082 | -1.043363 | H | 9.255507   | 4.001976   | -3.125281 |
| C | 1.228173  | -9.868754  | 0.314942  | C | 9.160678   | -3.870748 | 0.314942  | H | 8.093566   | 6.014516   | -3.125281 |
| N | 0.000000  | -10.503669 | 0.678073  | N | 9.096444   | -5.251835 | 0.678073  | H | 9.279495   | 3.255115   | 2.350838  |
| C | -1.228173 | -9.868754  | 0.314942  | C | 9.549920   | -2.138076 | -1.318081 | H | 9.663836   | 1.820735   | -2.350838 |
| C | -1.589231 | -9.696793  | -1.043363 | C | 9.868754   | -1.228173 | -0.314942 | H | 6.408721   | 7.458760   | -2.350838 |
| C | -2.138076 | -9.549920  | 1.318081  | C | 9.696793   | -1.589231 | 1.043363  | H | 7.458760   | 6.408721   | 2.350838  |
| C | -3.472082 | -9.192284  | 1.043363  | C | 9.339511   | -2.923332 | 1.318081  | H | 11.571097  | 4.189463   | 0.943648  |
| C | -3.870748 | -9.160678  | -0.314942 | C | 10.313471  | -5.954485 | 0.912503  | H | 13.645270  | 5.397696   | 1.378016  |
| C | -2.923332 | -9.339511  | -1.318081 | C | 10.330201  | -7.357150 | 1.037923  | H | 13.654743  | 7.883569   | 1.610716  |
| C | 2.923332  | -9.339511  | -1.318081 | C | 11.522275  | -8.035186 | 1.286786  | H | 11.497177  | 9.118302   | 1.378016  |
| C | 3.870748  | -9.160678  | -0.314942 | C | 12.729521  | -7.349392 | 1.415861  | H | 9.413729   | 7.926132   | 0.943648  |
| C | 3.472082  | -9.192284  | 1.043363  | C | 12.719813  | -5.960990 | 1.286786  | H | 4.189463   | 11.571097  | -0.943648 |
| C | 2.138076  | -9.549920  | 1.318081  | C | 11.536579  | -5.267641 | 1.037923  | H | 5.397696   | 13.645270  | -1.378016 |
| C | 0.000000  | -11.908970 | 0.912503  | C | 12.624791  | 1.206379  | -1.037923 | H | 7.883569   | 13.654743  | -1.610716 |
| C | -1.206379 | -12.624791 | 1.037923  | C | 13.996176  | 1.197538  | -1.286786 | H | 9.118302   | 11.497177  | -1.378016 |
| C | -1.197538 | -13.996176 | 1.286786  | C | 14.698785  | 0.000000  | -1.415861 | H | 7.926132   | 9.413729   | -0.943648 |
| C | 0.000000  | -14.698785 | 1.415861  | C | 13.996176  | -1.197538 | -1.286786 | H | 4.001976   | 9.255507   | 3.125281  |
| C | 1.197538  | -13.996176 | 1.286786  | C | 12.624791  | -1.206379 | -1.037923 | H | 6.014516   | 8.093566   | 3.125281  |
| C | 1.206379  | -12.624791 | 1.037923  | C | 11.908970  | 0.000000  | -0.912503 | H | 8.093566   | -6.014516  | -3.125281 |
| C | 7.357150  | -10.330201 | -1.037923 | N | 10.503669  | 0.000000  | -0.678073 | H | 9.255507   | -4.001976  | -3.125281 |
| C | 8.035186  | -11.522275 | -1.286786 | C | 9.916198   | 0.677646  | 2.155711  | H | 9.663836   | -1.820735  | -2.350838 |
| C | 7.349392  | -12.729521 | -1.415861 | C | 9.916198   | -0.677646 | 2.155711  | H | 9.279495   | -3.255115  | 2.350838  |
| C | 5.960990  | -12.719813 | -1.286786 | H | 1.820735   | 9.663836  | 2.350838  | H | 9.413729   | -7.926132  | 0.943648  |
| C | 5.267641  | -11.536579 | -1.037923 | H | 3.255115   | 9.279495  | -2.350838 | H | 11.497177  | -9.118302  | 1.378016  |
| C | 5.954485  | -10.313471 | -0.912503 | H | -8.093566  | 6.014516  | -3.125281 | H | 13.654743  | -7.883569  | 1.610716  |
| C | 6.626588  | -7.201436  | -1.318081 | H | -9.255507  | 4.001976  | -3.125281 | H | 13.645270  | -5.397696  | 1.378016  |
| C | 7.603054  | -6.224711  | -1.043363 | H | -7.458760  | 6.408721  | 2.350838  | H | 11.571097  | -4.189463  | 0.943648  |
| C | 7.932505  | -5.998006  | 0.314942  | H | -6.408721  | 7.458760  | -2.350838 | H | 12.115595  | 2.157367   | -0.943648 |
| C | 7.201436  | -6.626588  | 1.318081  | H | -9.663836  | 1.820735  | -2.350838 | H | 14.515999  | 2.148093   | -1.378016 |
| N | 5.251835  | -9.096444  | -0.678073 | H | -9.279495  | 3.255115  | 2.350838  | H | 15.767139  | 0.000000   | -1.610716 |
| C | 5.998006  | -7.932505  | -0.314942 | H | -9.413729  | 7.926132  | 0.943648  | H | 14.515999  | -2.148093  | -1.378016 |
| C | 6.224711  | -7.603054  | 1.043363  | H | -11.497177 | 9.118302  | 1.378016  | H | 12.115595  | -2.157367  | -0.943648 |
| C | 5.544958  | -8.248856  | 2.155711  | H | -13.654743 | 7.883569  | 1.610716  | H | 10.016492  | 1.161940   | 3.125281  |
| C | 4.371240  | -8.926502  | 2.155711  | H | -13.645270 | 5.397696  | 1.378016  | H | 10.016492  | -1.161940  | 3.125281  |

[14]N-belt E = -8311.08457515, H = -8308.257449

|   |           |          |           |   |           |            |           |   |           |           |           |
|---|-----------|----------|-----------|---|-----------|------------|-----------|---|-----------|-----------|-----------|
| C | -2.154489 | 1.913127 | 11.413072 | C | -1.279907 | -14.642777 | -5.721675 | H | -2.351487 | 8.515007  | 7.722455  |
| C | -2.154694 | 3.235076 | 11.112976 | C | -1.400900 | -14.756307 | -7.106045 | H | 2.351788  | 9.438879  | 6.575203  |
| C | -1.042300 | 4.085766 | 10.721358 | C | -1.272726 | -13.602531 | -7.878290 | H | 3.124855  | 8.183451  | 8.389533  |
| C | 0.316681  | 3.769742 | 10.963851 | C | -1.032330 | -12.362357 | -7.289055 | H | 3.124429  | 6.366400  | 9.832809  |
| N | 0.685222  | 2.706771 | 11.845985 | C | -0.914655 | -12.240216 | -5.890793 | H | 2.351052  | 0.738291  | 11.454280 |
| C | -1.318676 | 5.329472 | 10.120323 | C | -1.320274 | -11.075946 | -2.939408 | H | -2.351052 | -0.738291 | 11.454280 |
| C | -0.318507 | 6.235155 | 9.781104  | C | -1.044653 | -11.388415 | -1.593718 | H | -3.123734 | 11.020565 | -4.010943 |
| C | 1.040650  | 5.849592 | 9.878554  | C | 0.314077  | -11.555730 | -1.231435 | H | -3.124847 | 10.009421 | -6.099619 |
| C | 1.317051  | 4.602465 | 10.472354 | C | 1.315067  | -11.259529 | -2.151188 | H | 2.353567  | 11.030700 | -3.271918 |
| C | 0.914507  | 3.017559 | 13.219750 | N | -0.687649 | -10.971609 | -5.278055 | H | -2.348310 | 11.365461 | -1.832624 |



|   |           |           |            |   |           |            |            |   |           |            |            |
|---|-----------|-----------|------------|---|-----------|------------|------------|---|-----------|------------|------------|
| C | 1.037552  | 1.999534  | 14.185432  | C | -0.319448 | -10.943961 | -3.896799  | H | -2.351487 | 8.515007   | -7.722455  |
| C | 1.279919  | 2.310970  | 15.522319  | C | 1.039467  | -10.953961 | -3.498365  | H | 2.351788  | 9.438879   | -6.575203  |
| C | 1.404886  | 3.633891  | 15.944517  | C | 2.152292  | -10.731231 | -4.407452  | H | 0.952889  | 13.366386  | -4.038381  |
| C | 1.278389  | 4.646374  | 14.994328  | C | 2.152934  | -10.140555 | -5.627579  | H | 1.371129  | 15.523882  | -5.091267  |
| C | 1.035971  | 4.352104  | 13.653560  | C | -2.154694 | 3.235076   | -11.112976 | H | 1.589037  | 15.719410  | -7.571230  |
| C | -1.043140 | 9.854367  | 10.418857  | C | -2.154489 | 1.913127   | -11.413072 | H | 1.358105  | 13.657439  | -8.960776  |
| C | -1.287415 | 10.700879 | 11.499021  | C | -1.041825 | 0.977052   | -11.426841 | H | 0.939612  | 11.491547  | -7.925499  |
| C | -1.413081 | 10.200823 | 12.794457  | C | 0.317067  | 1.367284   | -11.508053 | H | -0.952613 | 10.284052  | -9.429346  |
| C | -1.285393 | 8.826009  | 12.988288  | N | 0.685222  | 2.706771   | -11.845985 | H | -1.377982 | 11.768494  | -11.314410 |
| C | -1.041106 | 7.965729  | 11.919058  | C | 0.316681  | 3.769742   | -10.963851 | H | -1.604348 | 10.865605  | -13.631619 |
| C | -0.918861 | 8.464042  | 10.607307  | C | -1.042300 | 4.085766   | -10.721358 | H | -1.374268 | 8.404488   | -13.986538 |
| C | -1.317862 | 8.699675  | 7.443494   | C | 1.317051  | 4.602465   | -10.472354 | H | -0.948882 | 6.904795   | -12.113631 |
| C | -1.040918 | 9.565974  | 6.367745   | C | 1.040650  | 5.849592   | -9.878554  | H | 3.124429  | 6.366400   | -9.832809  |
| C | 0.318271  | 9.872739  | 6.114757   | C | -0.318507 | 6.235155   | -9.781104  | H | 3.124855  | 8.183451   | -8.389533  |
| C | 1.318231  | 9.205681  | 6.815344   | C | -1.318676 | 5.329472   | -10.120323 | H | -3.124847 | 10.009421  | 6.099619   |
| N | -0.687728 | 7.588368  | 9.504557   | C | -1.317696 | -0.404378  | -11.423015 | H | -3.123734 | 13.800406  | 4.010943   |
| C | -0.318057 | 8.164055  | 8.249218   | C | -0.317067 | -1.367284  | -11.508053 | H | -2.348310 | 11.365461  | 1.832624   |
| C | 1.041257  | 8.345621  | 7.896023   | C | 1.041825  | -0.977052  | -11.426841 | H | 2.353567  | 11.030700  | 3.271918   |
| C | 2.153199  | 7.750461  | 8.619828   | C | 1.317696  | 0.404378   | -11.423015 | H | 0.939612  | 11.491547  | 7.925499   |
| C | 2.152946  | 6.688978  | 9.462947   | C | 0.914507  | 3.017559   | -13.219750 | H | 1.358105  | 13.657439  | 8.960776   |
| C | 0.317067  | 1.367284  | 11.508053  | C | 1.037552  | 1.999534   | -14.185432 | H | 1.589037  | 15.719410  | 7.571230   |
| C | -1.041825 | 0.977052  | 11.426841  | C | 1.279919  | 2.310970   | -15.522319 | H | 1.371129  | 15.523882  | 5.091267   |
| C | 1.317696  | 0.404378  | 11.423015  | C | 1.404886  | 3.633891   | -15.944517 | H | 0.952889  | 13.366386  | 4.038381   |
| C | 1.041825  | -0.977052 | 11.426841  | C | 1.278389  | 4.646374   | -14.994328 | H | -0.940733 | 13.800406  | -2.157880  |
| C | -0.317067 | -1.367284 | 11.508053  | C | 1.035971  | 4.352104   | -13.653560 | H | -1.360070 | 16.200799  | -2.148074  |
| C | -1.317696 | -0.404378 | 11.423015  | C | -1.035971 | -4.352104  | -13.653560 | H | -1.585150 | 17.454209  | 0.000000   |
| C | -2.152292 | 10.731231 | -4.407452  | C | -1.278389 | -4.646374  | -14.994328 | H | -1.360070 | 16.200799  | 2.148074   |
| C | -2.152934 | 10.140555 | -5.627579  | C | -1.404886 | -3.633891  | -15.944517 | H | -0.940733 | 13.800406  | 2.157880   |
| C | -1.040918 | 9.565974  | -6.367745  | C | -1.279919 | -2.310970  | -15.522319 | H | 3.129068  | 11.669237  | -1.160268  |
| C | 0.318271  | 9.872739  | -6.114757  | C | -1.037552 | -1.999534  | -14.185432 | H | 3.129068  | 11.669237  | 1.160268   |
| N | 0.687649  | 10.971609 | -5.278055  | C | -0.914507 | -3.017559  | -13.219750 | H | -3.124429 | -6.366400  | -9.832809  |
| C | 0.319448  | 10.943961 | -3.896799  | N | -0.685222 | -2.706771  | -11.845985 | H | -3.124855 | -8.183451  | -8.389533  |
| C | -1.039467 | 10.953961 | -3.498365  | C | 2.154694  | -3.235076  | -11.112976 | H | 2.352186  | -5.643182  | -10.003137 |
| C | 1.320274  | 11.075946 | -2.939408  | C | 2.154489  | -1.913127  | -11.413072 | H | -2.350494 | -4.315646  | -10.645636 |
| C | 1.044653  | 11.388415 | -1.593718  | C | -2.153199 | -7.750461  | 8.619828   | H | -2.351788 | -9.438879  | -6.575203  |
| C | -0.314077 | 11.555730 | -1.231435  | C | -2.152946 | -6.688978  | 9.462947   | H | 2.351487  | -8.515007  | -7.722455  |
| C | -1.315067 | 11.259529 | -2.151188  | C | -1.040650 | -5.849592  | 9.878554   | H | 0.948882  | -6.904795  | -12.113631 |
| C | -1.317862 | 8.699675  | -7.443494  | C | 0.318507  | -6.235155  | 9.781104   | H | 1.374268  | -8.404488  | -13.986538 |
| C | -0.318057 | 8.164055  | -8.249218  | N | 0.687728  | -7.588368  | 9.504557   | H | 1.604348  | -10.865605 | -13.631619 |
| C | 1.041257  | 8.345621  | -7.896023  | C | 0.318057  | -8.164055  | 8.249218   | H | 1.377982  | -11.768494 | -11.314410 |
| C | 1.318231  | 9.205681  | -6.815344  | C | -1.041257 | -8.345621  | 7.896023   | H | 0.952613  | -10.284052 | -9.429346  |
| C | 0.914655  | 12.240216 | -5.890793  | C | 1.317862  | -8.699675  | 7.443494   | H | -0.952889 | -13.366386 | -4.038381  |
| C | 1.039646  | 13.410233 | -5.116595  | C | 1.040918  | -9.565974  | 6.367745   | H | -1.371129 | -15.523882 | -5.091267  |
| C | 1.279907  | 14.642777 | -5.721675  | C | -0.318271 | -9.872739  | 6.114757   | H | -1.589037 | -15.719410 | -7.571230  |
| C | 1.400900  | 14.756307 | -7.106045  | C | -1.318231 | -9.205681  | 6.815344   | H | -1.358105 | -13.657439 | -8.960776  |
| C | 1.272726  | 13.602531 | -7.878290  | C | -1.317051 | -4.602465  | 10.472354  | H | -0.939612 | -11.491547 | -7.925499  |
| C | 1.032330  | 12.362357 | -7.289055  | C | -0.316681 | -3.769742  | 10.963851  | H | -2.353567 | -11.030700 | -3.271918  |
| C | -1.043140 | 9.854367  | -10.418857 | C | 1.042300  | -4.085766  | 10.721358  | H | 2.348310  | -11.365461 | -1.832624  |
| C | -1.287415 | 10.700879 | -11.499021 | C | 1.318676  | -5.329472  | 10.120323  | H | 3.123734  | -11.020565 | -4.010943  |
| C | -1.413081 | 10.200823 | -12.794457 | C | 0.918861  | -8.464042  | 10.607307  | H | 3.124847  | -10.009421 | -6.099619  |
| C | -1.285393 | 8.826009  | -12.988288 | C | 1.043140  | -9.854367  | 10.418857  | H | -3.126563 | 3.724567   | -11.090681 |
| C | -1.041106 | 7.965729  | -11.919058 | C | 1.287415  | -10.700879 | 11.499021  | H | -3.126219 | 1.461711   | -11.604381 |
| C | -0.918861 | 8.464042  | -10.607307 | C | 1.413081  | -10.200823 | 12.794457  | H | 2.350494  | 4.315646   | -10.645636 |
| N | -0.687728 | 7.588368  | -9.504557  | C | 1.285393  | -8.826009  | 12.988288  | H | -2.352186 | 5.643182   | -10.003137 |
| C | 2.152946  | 6.688978  | -9.462947  | C | 1.041106  | -7.965729  | 11.919058  | H | -2.351052 | -0.738291  | -11.454280 |
| C | 2.153199  | 7.750461  | -8.619828  | C | -1.037552 | -1.999534  | 14.185432  | H | 2.351052  | 0.738291   | -11.454280 |
| C | -2.152934 | 10.140555 | 5.627579   | C | -1.279919 | -2.310970  | 15.522319  | H | 0.947501  | 0.959065   | -13.900352 |
| C | -2.152292 | 10.731231 | 4.407452   | C | -1.404886 | -3.633891  | 15.944517  | H | 1.369512  | 1.498103   | -16.238771 |
| C | -1.039467 | 10.953961 | 3.498365   | C | -1.278389 | -4.646374  | 14.994328  | H | 1.594685  | 3.869805   | -16.987435 |
| C | 0.319448  | 10.943961 | 3.896799   | C | -1.035971 | -4.352104  | 13.653560  | H | 1.366752  | 5.688492   | -15.291422 |
| N | 0.687649  | 10.971609 | 5.278055   | C | -0.914507 | -3.017559  | 13.219750  | H | 0.944625  | 5.168589   | -12.948628 |
| C | -1.315067 | 11.259529 | 2.151188   | N | -0.685222 | -2.706771  | 11.845985  | H | -0.944625 | -5.168589  | -12.948628 |
| C | -0.314077 | 11.555730 | 1.231435   | C | 2.154489  | -1.913127  | 11.413072  | H | -1.366752 | -5.688492  | -15.291422 |
| C | 1.044653  | 11.388415 | 1.593718   | C | 2.154694  | -3.235076  | 11.112976  | H | -1.594685 | -3.869805  | -16.987435 |
| C | 1.320274  | 11.075946 | 2.939408   | C | -2.157289 | -11.582594 | -0.677799  | H | -1.369512 | -1.498103  | -16.238771 |
| C | 0.914655  | 12.240216 | 5.890793   | C | -2.157289 | -11.582594 | 0.677799   | H | -0.947501 | -0.959065  | -13.900352 |
| C | 1.032330  | 12.362357 | 7.289055   | C | -1.044653 | -11.388415 | 1.593718   | H | 3.126563  | -3.724567  | -11.090681 |
| C | 1.272726  | 13.602531 | 7.878290   | C | 0.314077  | -11.555730 | 1.231435   | H | 3.126219  | -1.461711  | -11.604381 |
| C | 1.400900  | 14.756307 | 7.106045   | N | 0.681604  | -12.182085 | 0.000000   | H | -3.124855 | -8.183451  | 8.389533   |
| C | 1.279907  | 14.642777 | 5.721675   | C | -1.320274 | -11.075946 | 2.939408   | H | -3.124429 | -6.366400  | 9.832809   |

|   |           |            |            |   |           |            |           |   |           |            |           |
|---|-----------|------------|------------|---|-----------|------------|-----------|---|-----------|------------|-----------|
| C | 1.039646  | 13.410233  | 5.116595   | C | -0.319448 | -10.943961 | 3.896799  | H | 2.351487  | -8.515007  | 7.722455  |
| C | -1.030804 | 14.308162  | -1.206009  | C | 1.039467  | -10.953961 | 3.498365  | H | -2.351788 | -9.438879  | 6.575203  |
| C | -1.271641 | 15.681086  | -1.197200  | C | 1.315067  | -11.259529 | 2.151188  | H | -2.350494 | -4.315646  | 10.645636 |
| C | -1.396548 | 16.384729  | 0.000000   | C | 0.909336  | -13.590706 | 0.000000  | H | 2.352186  | -5.643182  | 10.003137 |
| C | -1.271641 | 15.681086  | 1.197200   | C | 1.030804  | -14.308162 | -1.206009 | H | 0.952613  | -10.284052 | 9.429346  |
| C | -1.030804 | 14.308162  | 1.206009   | C | 1.271641  | -15.681086 | -1.197200 | H | 1.377982  | -11.768494 | 11.314410 |
| C | -0.909336 | 13.590706  | 0.000000   | C | 1.396548  | -16.384729 | 0.000000  | H | 1.604348  | -10.865605 | 13.631619 |
| N | -0.681604 | 12.182085  | 0.000000   | C | 1.271641  | -15.681086 | 1.197200  | H | 1.374268  | -8.404488  | 13.986538 |
| C | 2.157289  | 11.582594  | -0.677799  | C | 1.030804  | -14.308162 | 1.206009  | H | 0.948882  | -6.904795  | 12.113631 |
| C | 2.157289  | 11.582594  | 0.677799   | C | -1.032330 | -12.362357 | 7.289055  | H | -0.947501 | -0.959065  | 13.900352 |
| C | -2.152946 | -6.688978  | -9.462947  | C | -1.272726 | -13.602531 | 7.878290  | H | -1.369512 | -1.498103  | 16.238771 |
| C | -2.153199 | -7.750461  | -8.619828  | C | -1.400900 | -14.756307 | 7.106045  | H | -1.594685 | -3.869805  | 16.987435 |
| C | -1.041257 | -8.345621  | -7.896023  | C | -1.279907 | -14.642777 | 5.721675  | H | -1.366752 | -5.688492  | 15.291422 |
| C | 0.318057  | -8.164055  | -8.249218  | C | -1.039646 | -13.410233 | 5.116595  | H | -0.944625 | -5.168589  | 12.948628 |
| N | 0.687728  | -7.588368  | -9.504557  | C | -0.914655 | -12.240216 | 5.890793  | H | 3.126219  | -1.461711  | 11.604381 |
| C | 0.318507  | -6.235155  | -9.781104  | N | -0.687649 | -10.971609 | 5.278055  | H | 3.126563  | -3.724567  | 11.090681 |
| C | -1.040650 | -5.849592  | -9.878554  | C | 2.152934  | -10.140555 | 5.627579  | H | -3.129068 | -11.669237 | -1.160268 |
| C | 1.318676  | -5.329472  | -10.120323 | C | 2.152292  | -10.731231 | 4.407452  | H | -3.129068 | -11.669237 | 1.160268  |
| C | 1.042300  | -4.085766  | -10.721358 | H | -3.126219 | 1.461711   | 11.604381 | H | -2.353567 | -11.030700 | 3.271918  |
| C | -0.316681 | -3.769742  | -10.963851 | H | -3.126563 | 3.724567   | 11.090681 | H | 2.348310  | -11.365461 | 1.832624  |
| C | -1.317051 | -4.602465  | -10.472354 | H | -2.352186 | 5.643182   | 10.003137 | H | 0.940733  | -13.800406 | -2.157880 |
| C | -1.318231 | -9.205681  | -6.815344  | H | 2.350494  | 4.315646   | 10.645636 | H | 1.360070  | -16.200799 | -2.148074 |
| C | -0.318271 | -9.872739  | -6.114757  | H | 0.947501  | 0.959065   | 13.900352 | H | 1.585150  | -17.454209 | 0.000000  |
| C | 1.040918  | -9.565974  | -6.367745  | H | 1.369512  | 1.498103   | 16.238771 | H | 1.360070  | -16.200799 | 2.148074  |
| C | 1.317862  | -8.699675  | -7.443494  | H | 1.594685  | 3.869805   | 16.987435 | H | 0.940733  | -13.800406 | 2.157880  |
| C | 0.918861  | -8.464042  | -10.607307 | H | 1.366752  | 5.688492   | 15.291422 | H | -0.939612 | -11.491547 | 7.925499  |
| C | 1.041106  | -7.965729  | -11.919058 | H | 0.944625  | 5.168589   | 12.948628 | H | -1.358105 | -13.657439 | 8.960776  |
| C | 1.285393  | -8.826009  | -12.988288 | H | -0.952613 | 10.284052  | 9.429346  | H | -1.589037 | -15.719410 | 7.571230  |
| C | 1.413081  | -10.200823 | -12.794457 | H | -1.377982 | 11.768494  | 11.314410 | H | -1.371129 | -15.523882 | 5.091267  |
| C | 1.287415  | -10.700879 | -11.499021 | H | -1.604348 | 10.865605  | 13.631619 | H | -0.952889 | -13.366386 | 4.038381  |
| C | 1.043140  | -9.854367  | -10.418857 | H | -1.374268 | 8.404488   | 13.986538 | H | 3.124847  | -10.009421 | 6.099619  |
| C | -1.039646 | -13.410233 | -5.116595  | H | -0.948882 | 6.904795   | 12.113631 | H | 3.123734  | -11.020565 | 4.010943  |

[16]N-belt E = -9498.36259472, H = -9495.130978

|   |           |           |           |   |            |            |           |   |           |           |           |
|---|-----------|-----------|-----------|---|------------|------------|-----------|---|-----------|-----------|-----------|
| C | 4.434604  | 12.477539 | 2.152555  | C | -1.596974  | -13.048574 | -1.040189 | H | 10.514495 | 7.908278  | 2.351625  |
| C | 5.687214  | 11.958692 | 2.152555  | C | -1.234050  | -13.209267 | 0.319369  | H | 11.330019 | 6.687760  | -2.351625 |
| C | 6.468884  | 11.444175 | 1.040189  | C | -2.161786  | -12.929357 | 1.317646  | H | 10.226046 | 8.586940  | -3.125719 |
| C | 6.195081  | 11.731521 | -0.319369 | C | -7.613823  | -10.671050 | 1.317646  | H | 8.586940  | 10.226046 | -3.125719 |
| N | 5.291732  | 12.775370 | -0.692043 | C | -8.467757  | -10.212967 | 0.319369  | H | -6.161555 | 11.846637 | 3.125719  |
| C | 3.914854  | 12.676022 | -0.319369 | C | -8.097504  | -10.355966 | -1.040189 | H | -4.019960 | 12.733714 | 3.125719  |
| C | 3.518062  | 12.666446 | 1.040189  | C | -6.945081  | -11.117889 | -1.317646 | H | -6.687760 | 11.330019 | -2.351625 |
| C | 2.950621  | 12.772448 | -1.317646 | C | -5.831812  | -14.079241 | -0.915188 | H | -7.908278 | 10.514495 | 2.351625  |
| C | 1.596974  | 13.048574 | -1.040189 | C | -4.993005  | -15.204648 | -1.033870 | H | -1.842874 | 13.026868 | 2.351625  |
| C | 1.234050  | 13.209267 | 0.319369  | C | -5.526905  | -16.470812 | -1.268483 | H | -3.282573 | 12.740494 | -2.351625 |
| C | 2.161786  | 12.929357 | 1.317646  | C | -6.902309  | -16.663647 | -1.389975 | H | -7.906906 | 13.449411 | -0.947151 |
| C | 7.613823  | 10.671050 | 1.317646  | C | -7.738511  | -15.554735 | -1.268483 | H | -8.816109 | 15.670620 | -1.354745 |
| C | 8.467757  | 10.212967 | 0.319369  | C | -7.220722  | -14.281897 | -1.033870 | H | -7.311910 | 17.652511 | -1.573656 |
| C | 8.097504  | 10.355966 | -1.040189 | C | -12.136522 | -10.431502 | 1.033870  | H | -4.846871 | 17.314732 | -1.354745 |
| C | 6.945081  | 11.117889 | -1.317646 | C | -13.101992 | -11.409301 | 1.268483  | H | -3.919143 | 15.101196 | -0.947151 |
| C | 5.831812  | 14.079241 | -0.915188 | C | -12.753803 | -12.753803 | 1.389975  | H | 2.158162  | 15.451477 | 0.947151  |
| C | 4.993005  | 15.204648 | -1.033870 | C | -11.409301 | -13.101992 | 1.268483  | H | 2.148136  | 17.851544 | 1.354745  |
| C | 5.526905  | 16.470812 | -1.268483 | C | -10.431502 | -12.136522 | 1.033870  | H | 0.000000  | 19.106941 | 1.573656  |
| C | 6.902309  | 16.663647 | -1.389975 | C | -10.775784 | -10.775784 | 0.915188  | H | -2.148136 | 17.851544 | 1.354745  |
| C | 7.738511  | 15.554735 | -1.268483 | C | -10.671050 | -7.613823  | 1.317646  | H | -2.158162 | 15.451477 | 0.947151  |
| C | 7.220722  | 14.281897 | -1.033870 | C | -11.444175 | -6.468884  | 1.040189  | H | 1.159023  | 13.302790 | -3.125719 |
| C | 12.136522 | 10.431502 | 1.033870  | C | -11.731521 | -6.195081  | -0.319369 | H | -1.159023 | 13.302790 | -3.125719 |
| C | 13.101992 | 11.409301 | 1.268483  | C | -11.117889 | -6.945081  | -1.317646 | H | 12.733714 | -4.019960 | 3.125719  |
| C | 12.753803 | 12.753803 | 1.389975  | N | -9.777845  | -9.777845  | 0.692043  | H | 11.846637 | -6.161555 | 3.125719  |
| C | 11.409301 | 13.101992 | 1.268483  | C | -10.212967 | -8.467757  | 0.319369  | H | 12.740494 | -3.282573 | -2.351625 |
| C | 10.431502 | 12.136522 | 1.033870  | C | -10.355966 | -8.097504  | -1.040189 | H | 13.026868 | -1.842874 | 2.351625  |
| C | 10.775784 | 10.775784 | 0.915188  | C | -9.830694  | -8.871988  | -2.152555 | H | 10.514495 | -7.908278 | 2.351625  |
| C | 10.671050 | 7.613823  | 1.317646  | C | -8.871988  | -9.830694  | -2.152555 | H | 11.330019 | -6.687760 | -2.351625 |
| C | 11.444175 | 6.468884  | 1.040189  | C | 5.687214   | -11.958692 | 2.152555  | H | 15.101196 | -3.919143 | -0.947151 |
| C | 11.731521 | 6.195081  | -0.319369 | C | 4.434604   | -12.477539 | 2.152555  | H | 17.314732 | -4.846871 | -1.354745 |
| C | 11.117889 | 6.945081  | -1.317646 | C | 3.518062   | -12.666446 | 1.040189  | H | 17.652511 | -7.311910 | -1.573656 |
| N | 9.777845  | 9.777845  | 0.692043  | C | 3.914854   | -12.676022 | -0.319369 | H | 15.670620 | -8.816109 | -1.354745 |
| C | 10.212967 | 8.467757  | 0.319369  | N | 5.291732   | -12.775370 | -0.692043 | H | 13.449411 | -7.906906 | -0.947151 |
| C | 10.355966 | 8.097504  | -1.040189 | C | 6.195081   | -11.731521 | -0.319369 | H | 12.451895 | -9.399793 | 0.947151  |

|   |           |            |           |   |            |            |           |   |            |            |           |
|---|-----------|------------|-----------|---|------------|------------|-----------|---|------------|------------|-----------|
| C | 9.830694  | 8.871988   | -2.152555 | C | 6.468884   | -11.444175 | 1.040189  | H | 14.141909  | -11.103986 | 1.354745  |
| C | 8.871988  | 9.830694   | -2.152555 | C | 6.945081   | -11.117889 | -1.317646 | H | 13.510647  | -13.510647 | 1.573656  |
| C | -5.687214 | 11.958692  | 2.152555  | C | 8.097504   | -10.355966 | -1.040189 | H | 11.103986  | -14.141909 | 1.354745  |
| C | -4.434604 | 12.477539  | 2.152555  | C | 8.467757   | -10.212967 | 0.319369  | H | 9.399793   | -12.451895 | 0.947151  |
| C | -3.518062 | 12.666446  | 1.040189  | C | 7.613823   | -10.671050 | 1.317646  | H | 8.586940   | -10.226046 | -3.125719 |
| C | -3.914854 | 12.676022  | -0.319369 | C | 2.161786   | -12.929357 | 1.317646  | H | 10.226046  | -8.586940  | -3.125719 |
| N | -5.291732 | 12.775370  | -0.692043 | C | 1.234050   | -13.209267 | 0.319369  | H | 11.846637  | 6.161555   | 3.125719  |
| C | -6.195081 | 11.731521  | -0.319369 | C | 1.596974   | -13.048574 | -1.040189 | H | 12.733714  | 4.019960   | 3.125719  |
| C | -6.468884 | 11.444175  | 1.040189  | C | 2.950621   | -12.772448 | -1.317646 | H | 13.026868  | 1.842874   | 2.351625  |
| C | -6.945081 | 11.117889  | -1.317646 | C | 5.831812   | -14.079241 | -0.915188 | H | 12.740494  | 3.282573   | -2.351625 |
| C | -8.097504 | 10.355966  | -1.040189 | C | 4.993005   | -15.204648 | -1.033870 | H | 13.449411  | 7.906906   | -0.947151 |
| C | -8.467757 | 10.212967  | 0.319369  | C | 5.526905   | -16.470812 | -1.268483 | H | 15.670620  | 8.816109   | -1.354745 |
| C | -7.613823 | 10.671050  | 1.317646  | C | 6.902309   | -16.663647 | -1.389975 | H | 17.652511  | 7.311910   | -1.573656 |
| C | -2.161786 | 12.929357  | 1.317646  | C | 7.738511   | -15.554735 | -1.268483 | H | 17.314732  | 4.846871   | -1.354745 |
| C | -1.234050 | 13.209267  | 0.319369  | C | 7.220722   | -14.281897 | -1.033870 | H | 15.101196  | 3.919143   | -0.947151 |
| C | -1.596974 | 13.048574  | -1.040189 | C | -1.205632  | -15.958003 | 1.033870  | H | 15.451477  | -2.158162  | 0.947151  |
| C | -2.950621 | 12.772448  | -1.317646 | C | -1.196913  | -17.332101 | 1.268483  | H | 17.851544  | -2.148136  | 1.354745  |
| C | -5.831812 | 14.079241  | -0.915188 | C | 0.000000   | -18.036602 | 1.389975  | H | 19.106941  | 0.000000   | 1.573656  |
| C | -7.220722 | 14.281897  | -1.033870 | C | 1.196913   | -17.332101 | 1.268483  | H | 17.851544  | 2.148136   | 1.354745  |
| C | -7.738511 | 15.554735  | -1.268483 | C | 1.205632   | -15.958003 | 1.033870  | H | 15.451477  | 2.158162   | 0.947151  |
| C | -6.902309 | 16.663647  | -1.389975 | C | 0.000000   | -15.239260 | 0.915188  | H | 13.302790  | -1.159023  | -3.125719 |
| C | -5.526905 | 16.470812  | -1.268483 | N | 0.000000   | -13.827961 | 0.692043  | H | 13.302790  | 1.159023   | -3.125719 |
| C | -4.993005 | 15.204648  | -1.033870 | C | -0.677907  | -13.224793 | -2.152555 | H | -4.019960  | -12.733714 | 3.125719  |
| C | 1.205632  | 15.958003  | 1.033870  | C | 0.677907   | -13.224793 | -2.152555 | H | -6.161555  | -11.846637 | 3.125719  |
| C | 1.196913  | 17.332101  | 1.268483  | C | -12.477539 | 4.434604   | 2.152555  | H | -3.282573  | -12.740494 | -2.351625 |
| C | 0.000000  | 18.036602  | 1.389975  | C | -11.958692 | 5.687214   | 2.152555  | H | -1.842874  | -13.026868 | 2.351625  |
| C | -1.196913 | 17.332101  | 1.268483  | C | -11.444175 | 6.468884   | 1.040189  | H | -7.908278  | -10.514495 | 2.351625  |
| C | -1.205632 | 15.958003  | 1.033870  | C | -11.731521 | 6.195081   | -0.319369 | H | -6.687760  | -11.330019 | -2.351625 |
| C | 0.000000  | 15.239260  | 0.915188  | N | -12.775370 | 5.291732   | -0.692043 | H | -3.919143  | -15.101196 | -0.947151 |
| N | 0.000000  | 13.827961  | 0.692043  | C | -12.676022 | 3.914854   | -0.319369 | H | -4.846871  | -17.314732 | -1.354745 |
| C | 0.677907  | 13.224793  | -2.152555 | C | -12.666446 | 3.518062   | 1.040189  | H | -7.311910  | -17.652511 | -1.573656 |
| C | -0.677907 | 13.224793  | -2.152555 | C | -12.772448 | 2.950621   | -1.317646 | H | -8.816109  | -15.670620 | -1.354745 |
| C | 12.477539 | -4.434604  | 2.152555  | C | -13.048574 | 1.596974   | -1.040189 | H | -7.906906  | -13.449411 | -0.947151 |
| C | 11.958692 | -5.687214  | 2.152555  | C | -13.209267 | 1.234050   | 0.319369  | H | -12.451895 | -9.399793  | 0.947151  |
| C | 11.444175 | -6.468884  | 1.040189  | C | -12.929357 | 2.161786   | 1.317646  | H | -14.141909 | -11.103986 | 1.354745  |
| C | 11.731521 | -6.195081  | -0.319369 | C | -10.671050 | 7.613823   | 1.317646  | H | -13.510647 | -13.510647 | 1.573656  |
| N | 12.775370 | -5.291732  | -0.692043 | C | -10.212967 | 8.467757   | 0.319369  | H | -11.103986 | -14.141909 | 1.354745  |
| C | 12.676022 | -3.914854  | -0.319369 | C | -10.355966 | 8.097504   | -1.040189 | H | -9.399793  | -12.451895 | 0.947151  |
| C | 12.666446 | -3.518062  | 1.040189  | C | -11.117889 | 6.945081   | -1.317646 | H | -10.514495 | -7.908278  | 2.351625  |
| C | 12.772448 | -2.950621  | -1.317646 | C | -14.079241 | 5.831812   | -0.915188 | H | -11.330019 | -6.687760  | -2.351625 |
| C | 13.048574 | -1.596974  | -1.040189 | C | -15.204648 | 4.993005   | -1.033870 | H | -10.226046 | -8.586940  | -3.125719 |
| C | 13.209267 | -1.234050  | 0.319369  | C | -16.470812 | 5.526905   | -1.268483 | H | -8.586940  | -10.226046 | -3.125719 |
| C | 12.929357 | -2.161786  | 1.317646  | C | -16.663647 | 6.902309   | -1.389975 | H | 6.161555   | -11.846637 | 3.125719  |
| C | 10.671050 | -7.613823  | 1.317646  | C | -15.554735 | 7.738511   | -1.268483 | H | 4.019960   | -12.733714 | 3.125719  |
| C | 10.212967 | -8.467757  | 0.319369  | C | -14.281897 | 7.220722   | -1.033870 | H | 6.687760   | -11.330019 | -2.351625 |
| C | 10.355966 | -8.097504  | -1.040189 | C | -10.431502 | 12.136522  | 1.033870  | H | 7.908278   | -10.514495 | 2.351625  |
| C | 11.117889 | -6.945081  | -1.317646 | C | -11.409301 | 13.101992  | 1.268483  | H | 1.842874   | -13.026868 | 2.351625  |
| C | 14.079241 | -5.831812  | -0.915188 | C | -12.753803 | 12.753803  | 1.389975  | H | 3.282573   | -12.740494 | -2.351625 |
| C | 15.204648 | -4.993005  | -1.033870 | C | -13.101992 | 11.409301  | 1.268483  | H | 3.919143   | -15.101196 | -0.947151 |
| C | 16.470812 | -5.526905  | -1.268483 | C | -12.136522 | 10.431502  | 1.033870  | H | 4.846871   | -17.314732 | -1.354745 |
| C | 16.663647 | -6.902309  | -1.389975 | C | -10.775784 | 10.775784  | 0.915188  | H | 7.311910   | -17.652511 | -1.573656 |
| C | 15.554735 | -7.738511  | -1.268483 | N | -9.777845  | 9.777845   | 0.692043  | H | 8.816109   | -15.670620 | -1.354745 |
| C | 14.281897 | -7.220722  | -1.033870 | C | -8.871988  | 9.830694   | -2.152555 | H | 7.906906   | -13.449411 | -0.947151 |
| C | 12.136522 | -10.431502 | 1.033870  | C | -9.830694  | 8.871988   | -2.152555 | H | -2.158162  | -15.451477 | 0.947151  |
| C | 13.101992 | -11.409301 | 1.268483  | C | -11.958692 | -5.687214  | 2.152555  | H | -2.148136  | -17.851544 | 1.354745  |
| C | 12.753803 | -12.753803 | 1.389975  | C | -12.477539 | -4.434604  | 2.152555  | H | 0.000000   | -19.106941 | 1.573656  |
| C | 11.409301 | -13.101992 | 1.268483  | C | -12.666446 | -3.518062  | 1.040189  | H | 2.148136   | -17.851544 | 1.354745  |
| C | 10.431502 | -12.136522 | 1.033870  | C | -12.676022 | -3.914854  | -0.319369 | H | 2.158162   | -15.451477 | 0.947151  |
| C | 10.775784 | -10.775784 | 0.915188  | N | -12.775370 | -5.291732  | -0.692043 | H | -1.159023  | -13.302790 | -3.125719 |
| N | 9.777845  | -9.777845  | 0.692043  | C | -12.929357 | -2.161786  | 1.317646  | H | 1.159023   | -13.302790 | -3.125719 |
| C | 8.871988  | -9.830694  | -2.152555 | C | -13.209267 | -1.234050  | 0.319369  | H | -12.733714 | 4.019960   | 3.125719  |
| C | 9.830694  | -8.871988  | -2.152555 | C | -13.048574 | -1.596974  | -1.040189 | H | -11.846637 | 6.161555   | 3.125719  |
| C | 11.958692 | 5.687214   | 2.152555  | C | -12.772448 | -2.950621  | -1.317646 | H | -12.740494 | 3.282573   | -2.351625 |
| C | 12.477539 | 4.434604   | 2.152555  | C | -14.079241 | -5.831812  | -0.915188 | H | -13.026868 | 1.842874   | 2.351625  |
| C | 12.666446 | 3.518062   | 1.040189  | C | -14.281897 | -7.220722  | -1.033870 | H | -10.514495 | 7.908278   | 2.351625  |
| C | 12.676022 | 3.914854   | -0.319369 | C | -15.554735 | -7.738511  | -1.268483 | H | -11.330019 | 6.687760   | -2.351625 |
| N | 12.775370 | 5.291732   | -0.692043 | C | -16.663647 | -6.902309  | -1.389975 | H | -15.101196 | 3.919143   | -0.947151 |
| C | 12.929357 | 2.161786   | 1.317646  | C | -16.470812 | -5.526905  | -1.268483 | H | -17.314732 | 4.846871   | -1.354745 |
| C | 13.209267 | 1.234050   | 0.319369  | C | -15.204648 | -4.993005  | -1.033870 | H | -17.652511 | 7.311910   | -1.573656 |
| C | 13.048574 | 1.596974   | -1.040189 | C | -15.958003 | 1.205632   | 1.033870  | H | -15.670620 | 8.816109   | -1.354745 |

|   |           |            |           |   |            |           |           |   |            |           |           |
|---|-----------|------------|-----------|---|------------|-----------|-----------|---|------------|-----------|-----------|
| C | 12.772448 | 2.950621   | -1.317646 | C | -17.332101 | 1.196913  | 1.268483  | H | -13.449411 | 7.906906  | -0.947151 |
| C | 14.079241 | 5.831812   | -0.915188 | C | -18.036602 | 0.000000  | 1.389975  | H | -9.399793  | 12.451895 | 0.947151  |
| C | 14.281897 | 7.220722   | -1.033870 | C | -17.332101 | -1.196913 | 1.268483  | H | -11.103986 | 14.141909 | 1.354745  |
| C | 15.554735 | 7.738511   | -1.268483 | C | -15.958003 | -1.205632 | 1.033870  | H | -13.510647 | 13.510647 | 1.573656  |
| C | 16.663647 | 6.902309   | -1.389975 | C | -15.239260 | 0.000000  | 0.915188  | H | -14.141909 | 11.103986 | 1.354745  |
| C | 16.470812 | 5.526905   | -1.268483 | N | -13.827961 | 0.000000  | 0.692043  | H | -12.451895 | 9.399793  | 0.947151  |
| C | 15.204648 | 4.993005   | -1.033870 | C | -13.224793 | 0.677907  | -2.152555 | H | -8.586940  | 10.226046 | -3.125719 |
| C | 15.958003 | -1.205632  | 1.033870  | C | -13.224793 | -0.677907 | -2.152555 | H | -10.226046 | 8.586940  | -3.125719 |
| C | 17.332101 | -1.196913  | 1.268483  | H | 4.019960   | 12.733714 | 3.125719  | H | -11.846637 | -6.161555 | 3.125719  |
| C | 18.036602 | 0.000000   | 1.389975  | H | 6.161555   | 11.846637 | 3.125719  | H | -12.733714 | -4.019960 | 3.125719  |
| C | 17.332101 | 1.196913   | 1.268483  | H | 3.282573   | 12.740494 | -2.351625 | H | -13.026868 | -1.842874 | 2.351625  |
| C | 15.958003 | 1.205632   | 1.033870  | H | 1.842874   | 13.026868 | 2.351625  | H | -12.740494 | -3.282573 | -2.351625 |
| C | 15.239260 | 0.000000   | 0.915188  | H | 7.908278   | 10.514495 | 2.351625  | H | -13.449411 | -7.906906 | -0.947151 |
| N | 13.827961 | 0.000000   | 0.692043  | H | 6.687760   | 11.330019 | -2.351625 | H | -15.670620 | -8.816109 | -1.354745 |
| C | 13.224793 | -0.677907  | -2.152555 | H | 3.919143   | 15.101196 | -0.947151 | H | -17.652511 | -7.311910 | -1.573656 |
| C | 13.224793 | 0.677907   | -2.152555 | H | 4.846871   | 17.314732 | -1.354745 | H | -17.314732 | -4.846871 | -1.354745 |
| C | -4.434604 | -12.477539 | 2.152555  | H | 7.311910   | 17.652511 | -1.573656 | H | -15.101196 | -3.919143 | -0.947151 |
| C | -5.687214 | -11.958692 | 2.152555  | H | 8.816109   | 15.670620 | -1.354745 | H | -15.451477 | 2.158162  | 0.947151  |
| C | -6.468884 | -11.444175 | 1.040189  | H | 7.906906   | 13.449411 | -0.947151 | H | -17.851544 | 2.148136  | 1.354745  |
| C | -6.195081 | -11.731521 | -0.319369 | H | 12.451895  | 9.399793  | 0.947151  | H | -19.106941 | 0.000000  | 1.573656  |
| N | -5.291732 | -12.775370 | -0.692043 | H | 14.141909  | 11.103986 | 1.354745  | H | -17.851544 | -2.148136 | 1.354745  |
| C | -3.914854 | -12.660222 | -0.319369 | H | 13.510647  | 13.510647 | 1.573656  | H | -15.451477 | -2.158162 | 0.947151  |
| C | -3.518062 | -12.666446 | 1.040189  | H | 11.103986  | 14.141909 | 1.354745  | H | -13.302790 | 1.159023  | -3.125719 |
| C | -2.950621 | -12.772448 | -1.317646 | H | 9.399793   | 12.451895 | 0.947151  | H | -13.302790 | -1.159023 | -3.125719 |

### 3 E = -825.902052305, H = -825.594096

|   |           |           |           |   |           |           |           |   |           |           |           |
|---|-----------|-----------|-----------|---|-----------|-----------|-----------|---|-----------|-----------|-----------|
| C | -3.665883 | -1.930679 | -0.308450 | C | 0.000603  | 1.547039  | -0.138323 | C | 3.286049  | -1.258617 | -1.473415 |
| C | -2.814441 | -1.947400 | 0.790602  | C | 1.210714  | -0.590114 | -0.409325 | H | 1.758959  | -0.043777 | -2.404823 |
| C | -3.287119 | -1.256207 | -1.473272 | C | 1.563973  | -1.298499 | 0.760722  | C | 3.664214  | -1.933663 | -0.308727 |
| C | -1.565125 | -1.297083 | 0.760905  | H | 1.171153  | -1.613858 | 2.863640  | H | 3.101540  | -2.486384 | 1.691044  |
| H | -3.103687 | -2.483522 | 1.691425  | C | 1.209130  | 2.253482  | 0.015533  | C | 0.001921  | 4.316477  | 0.446519  |
| C | -2.063360 | -0.591393 | -1.518505 | C | -1.207226 | 2.254770  | 0.014662  | H | 2.150345  | 4.134049  | 0.415961  |
| C | -1.211288 | -0.589154 | -0.409238 | C | 2.062843  | -0.592792 | -1.518552 | H | -2.146667 | 4.136369  | 0.414452  |
| C | -0.676627 | -1.406741 | 1.916509  | C | 2.812744  | -1.949875 | 0.790306  | H | 3.944953  | -1.242894 | -2.337095 |
| H | -1.758996 | -0.042817 | -2.404883 | C | 1.200510  | 3.616978  | 0.302027  | H | 4.619787  | -2.448620 | -0.261196 |
| N | 0.000022  | 0.170176  | -0.453881 | H | 2.155866  | 1.735769  | -0.085294 | H | -3.945977 | -1.240129 | -2.336980 |
| C | 0.675490  | -1.407406 | 1.916408  | C | -1.197299 | 3.618291  | 0.301200  | H | -4.621888 | -2.444824 | -0.260834 |
| H | -1.172357 | -1.612703 | 2.863811  | H | -2.154482 | 1.738139  | -0.086844 | H | 0.002355  | 5.379485  | 0.669273  |

### 4 E = -1419.55538083, H = -1419.045518

|   |           |           |           |   |           |           |           |   |           |           |           |
|---|-----------|-----------|-----------|---|-----------|-----------|-----------|---|-----------|-----------|-----------|
| N | -2.799591 | -0.041196 | 0.404815  | H | -6.495507 | 2.662483  | 0.760647  | C | 2.638187  | 2.378217  | -0.790592 |
| C | -3.411941 | 1.220712  | 0.581976  | C | -5.075366 | -2.982210 | 0.619222  | C | 4.250076  | -1.919442 | -0.981957 |
| C | -1.390315 | -0.142594 | 0.187609  | H | -4.135757 | -1.632258 | 2.022798  | C | 4.540969  | -2.589504 | 1.701374  |
| C | -2.637777 | 2.378395  | 0.789134  | C | -4.541529 | -2.589051 | -1.701558 | C | 5.410736  | 2.593766  | -0.772325 |
| C | -4.813894 | 1.351057  | 0.573325  | C | -2.936750 | -0.844092 | -2.410840 | H | 5.437829  | 0.480908  | -0.402890 |
| C | -3.572821 | -1.177849 | 0.008693  | C | 1.390126  | -0.142606 | -0.187613 | C | 3.251425  | 3.613600  | -0.988913 |
| C | -0.526998 | -0.162631 | 1.279743  | C | 1.717873  | -0.264779 | 2.313057  | H | 1.556336  | 2.313908  | -0.796207 |
| C | -0.870641 | -0.182197 | -1.127772 | H | 0.958240  | -0.153151 | -2.276781 | C | 5.075449  | -2.982014 | -0.619366 |
| C | -3.250662 | 3.613909  | 0.987594  | H | -1.262130 | 0.091193  | -3.235238 | H | 4.136213  | -1.631696 | -2.022833 |
| H | -1.555924 | 2.313965  | 0.793481  | C | -5.226299 | -3.311861 | -0.731156 | C | 5.225975  | -3.312069 | 0.730964  |
| C | -5.410341 | 2.594224  | 0.774015  | H | -4.648975 | -2.854381 | -2.750618 | H | 4.648183  | -2.855073 | 2.750398  |
| H | -5.438085 | 0.481178  | 0.405752  | H | -3.373414 | -0.911035 | -3.405930 | C | 4.641022  | 3.737943  | -0.984512 |
| C | -4.249916 | -1.919707 | 0.981872  | N | 2.799426  | -0.041246 | -0.404818 | H | 6.495888  | 2.661968  | -0.757716 |
| C | -3.687973 | -1.522549 | -1.356603 | C | 2.936367  | -0.844423 | 2.410769  | H | 2.626203  | 4.489143  | -1.146658 |
| C | 0.870443  | -0.181961 | 1.127773  | H | 1.262058  | 0.091362  | 3.235248  | H | 5.605727  | -3.542901 | -1.383876 |
| H | -0.958428 | -0.152592 | 2.276783  | C | 3.411979  | 1.220572  | -0.581921 | H | 5.873797  | -4.133584 | 1.024055  |
| C | 0.526814  | -0.162963 | -1.279736 | C | 3.572612  | -1.177926 | -0.008770 | H | -5.874204 | -4.133293 | -1.024296 |
| C | -1.718064 | -0.264858 | -2.313069 | C | 3.687513  | -1.522894 | 1.356485  | H | -5.605395 | -3.543335 | 1.383729  |
| C | -4.640275 | 3.738403  | 0.984740  | H | 3.373015  | -0.911574 | 3.405855  | H | -5.111692 | 4.704271  | 1.140918  |
| H | -2.625202 | 4.489493  | 1.144161  | C | 4.813946  | 1.350781  | -0.571667 | H | 5.112697  | 4.703696  | -1.140624 |

### N-Belt 2 (B3LYP/6-31G(d)) E = -4249.03532993

|   |           |           |          |   |           |           |           |   |           |          |          |
|---|-----------|-----------|----------|---|-----------|-----------|-----------|---|-----------|----------|----------|
| N | -0.745899 | -5.476122 | 0.630555 | C | 5.321413  | -5.645223 | -0.802471 | C | -6.416296 | 6.489844 | 0.929204 |
| C | -0.935285 | -6.879470 | 0.720215 | C | 6.796299  | -3.744783 | -0.769720 | H | -4.326241 | 6.074135 | 0.766341 |
| C | -1.841070 | -4.615992 | 0.297742 | C | 4.684022  | -1.066472 | -1.318718 | C | -7.898595 | 4.594817 | 0.898356 |
| C | -2.228200 | -7.431091 | 0.802471 | C | 4.794966  | -0.225023 | 1.318723  | H | -6.967386 | 2.675911 | 0.707539 |
| C | 0.155072  | -7.758159 | 0.769720 | C | -8.828518 | -2.311753 | -0.929204 | C | -0.913679 | 4.759778 | 1.054811 |

|   |           |            |           |   |            |           |           |   |            |           |           |
|---|-----------|------------|-----------|---|------------|-----------|-----------|---|------------|-----------|-----------|
| C | 0.538994  | -4.940132  | 0.297733  | H | -7.423476  | -0.709567 | -0.766341 | H | -2.529050  | 4.131056  | 2.346194  |
| C | -2.592359 | -4.040051  | 1.318723  | C | -7.928525  | -4.542976 | -0.898356 | H | 10.330390  | -5.880608 | -0.240163 |
| C | -2.155535 | -4.343909  | -1.054798 | H | -5.801100  | -4.695978 | -0.707539 | H | 10.217896  | -5.759460 | -2.020649 |
| C | -2.412222 | -8.801598  | 0.929204  | C | -4.578928  | 1.588620  | -1.054811 | H | 10.692191  | -7.302502 | -1.257691 |
| H | -3.097235 | -6.783702  | 0.766341  | H | -4.842125  | -0.124693 | -2.346194 | C | 2.592359   | 4.040051  | -1.318723 |
| C | -0.029930 | -9.137792  | 0.898356  | C | -4.547776  | 2.003284  | 0.297733  | C | 8.828518   | 2.311753  | 0.929204  |
| H | 1.166286  | -7.371889  | 0.707539  | H | -4.638529  | 1.416406  | 2.346188  | H | 7.423476   | 0.709567  | 0.766341  |
| C | 1.418419  | -4.589718  | 1.318718  | C | 6.416296   | -6.489844 | -0.929204 | C | 7.928525   | 4.542976  | 0.898356  |
| C | 0.913679  | -4.759778  | -1.054811 | H | 4.326241   | -6.074135 | -0.766341 | H | 5.801100   | 4.695978  | 0.707539  |
| C | -3.665249 | -3.171158  | 1.054811  | C | 7.898595   | -4.594817 | -0.898356 | C | 2.155535   | 4.343909  | 1.054798  |
| H | -2.313075 | -4.255749  | 2.346194  | H | 6.967386   | -2.675911 | -0.707539 | H | 3.545908   | 3.308881  | 2.346188  |
| C | -3.265602 | -3.523246  | -1.318718 | C | 4.839703   | 0.305206  | -1.054798 | C | -0.538994  | 4.940132  | -0.297733 |
| C | -1.340832 | -4.825622  | -2.167725 | H | 4.638529   | -1.416406 | -2.346188 | H | -1.092621  | 4.725286  | -2.346188 |
| C | -1.317334 | -9.672736  | 0.979409  | C | 4.918101   | 0.713583  | 0.297742  | C | -7.718168  | 5.977213  | 0.979409  |
| H | -3.412425 | -9.219926  | 0.990363  | H | 4.842125   | 0.124693  | 2.346194  | H | -6.278478  | 7.565210  | 0.990363  |
| H | 0.845127  | -9.777380  | 0.930726  | C | -9.035503  | -3.695523 | -0.979409 | H | -8.890023  | 4.156789  | 0.930726  |
| C | 2.684168  | -4.038703  | 1.054798  | H | -9.690903  | -1.654716 | -0.990363 | C | 0.000000   | 5.006657  | 2.167748  |
| H | 1.092621  | -4.725286  | 2.346188  | H | -8.044896  | -5.620591 | -0.930726 | C | 1.841070   | 4.615992  | -0.297742 |
| C | 2.202607  | -4.265074  | -1.318723 | C | -4.335892  | 2.503328  | -2.167748 | H | 2.313075   | 4.255749  | -2.346194 |
| C | 0.000000  | -5.006657  | -2.167748 | N | -4.369512  | 3.384028  | 0.630555  | C | 9.035503   | 3.695523  | 0.979409  |
| C | -4.008783 | -2.936848  | -0.297733 | C | 7.718168   | -5.977213 | -0.979409 | H | 9.690903   | 1.654716  | 0.990363  |
| C | -4.335892 | -2.503328  | 2.167748  | H | 6.278478   | -7.565210 | -0.990363 | H | 8.044896   | 6.205591  | 0.930726  |
| H | -3.545908 | -3.308881  | -2.346188 | H | 8.890023   | -4.156789 | -0.930726 | C | 1.340832   | 4.825622  | 2.167725  |
| H | -1.860402 | -4.933197  | -3.118181 | C | 4.849527   | 1.251617  | -2.167725 | N | 0.745899   | 5.476122  | -0.630555 |
| O | -1.612563 | -11.006771 | 1.106042  | N | 5.115410   | 2.092094  | 0.630555  | O | -8.725862  | 6.899906  | 1.106042  |
| C | 3.077031  | -3.902409  | -0.297742 | O | -10.338425 | -4.106865 | -1.106042 | H | -0.472324  | 5.248187  | 3.118262  |
| C | 3.508696  | -3.574005  | 2.167725  | C | -3.508696  | 3.574005  | -2.167725 | O | 10.338425  | 4.106865  | 1.106042  |
| H | 2.529050  | -4.131056  | -2.346194 | H | -4.781225  | 2.215049  | -3.118262 | H | 1.860402   | 4.933197  | 3.118181  |
| H | 0.472324  | -5.248187  | -3.118262 | C | -5.490153  | 4.249715  | 0.720215  | C | 0.935285   | 6.879470  | -0.720215 |
| N | -5.115410 | -2.092094  | -0.630555 | C | -3.077031  | 3.902409  | 0.297742  | C | -10.056361 | 6.420353  | 1.157484  |
| C | -4.849527 | -1.251617  | 2.167725  | O | 8.725862   | -6.899906 | -1.106042 | C | 10.588369  | 5.498888  | 1.157484  |
| H | -4.308901 | -3.033138  | 3.118262  | C | 4.335892   | 2.503328  | -2.167748 | C | 2.228200   | 7.431091  | -0.802471 |
| C | -0.532008 | -11.919241 | 1.157484  | H | 5.202475   | 0.855443  | -3.118181 | C | -0.155072  | 7.758159  | -0.769720 |
| N | 4.369512  | -3.384028  | -0.630555 | C | 6.425438   | 2.629755  | 0.720215  | H | -10.330390 | 5.880608  | 0.240163  |
| C | 4.335892  | -2.503328  | 2.167748  | C | 4.008783   | 2.936848  | 0.297733  | H | -10.217896 | 5.759460  | 2.020649  |
| H | 3.342073  | -4.077754  | 3.118181  | C | -10.588369 | -5.498888 | -1.157484 | H | -10.692191 | 7.302502  | 1.257691  |
| C | -6.425438 | -2.629755  | -0.720215 | C | -2.684168  | 4.038703  | -1.054798 | H | 10.257951  | 6.006076  | 0.240163  |
| C | -4.918101 | -0.713583  | -0.297742 | H | -3.342073  | 4.077754  | -3.118181 | H | 10.096787  | 5.969228  | 2.020649  |
| C | -4.839703 | -0.305206  | 1.054798  | C | -5.321413  | 5.645223  | 0.802471  | H | 11.670247  | 5.608458  | 1.257691  |
| H | -5.202475 | -0.855443  | 3.118181  | C | -6.796299  | 3.744783  | 0.769720  | C | 2.412222   | 8.801598  | -0.929204 |
| H | 0.072439  | -11.886684 | 0.240163  | C | -2.202607  | 4.265074  | 1.318723  | H | 3.097235   | 6.783702  | -0.766341 |
| H | 0.121109  | -11.728688 | 2.020649  | C | 10.056361  | -6.420353 | -1.157484 | C | 0.029930   | 9.137792  | -0.898356 |
| H | -0.978057 | -12.910960 | 1.257691  | C | 3.665249   | 3.171158  | -1.054811 | H | -1.166286  | 7.371889  | -0.707539 |
| C | 5.490153  | -4.249715  | -0.720215 | H | 4.308901   | 3.033138  | -3.118262 | C | 1.317334   | 9.672736  | -0.979409 |
| C | 4.547776  | -2.003284  | -0.297733 | C | 7.549613   | 1.785867  | 0.802471  | H | 3.412425   | 9.219926  | -0.990363 |
| C | 4.578928  | -1.588620  | 1.054811  | C | 6.641227   | 4.013376  | 0.769720  | H | -0.845127  | 9.777380  | -0.930726 |
| H | 4.781225  | -2.215049  | 3.118262  | C | 3.265602   | 3.523246  | 1.318718  | O | 1.612563   | 11.006771 | -1.106042 |
| C | -7.549613 | -1.785867  | -0.802471 | H | -10.257951 | -6.006076 | -0.240163 | C | 0.532008   | 11.919241 | -1.157484 |
| C | -6.641227 | -4.013376  | -0.769720 | H | -10.096787 | -5.969228 | -2.020649 | H | -0.072439  | 11.886684 | -0.240163 |
| C | -4.794966 | 0.225023   | -1.318723 | H | -11.670247 | -5.608458 | -1.257691 | H | -0.121109  | 11.728688 | -2.020649 |
| C | -4.684022 | 1.066472   | 1.318718  | C | -1.418419  | 4.589718  | -1.318718 | H | 0.978057   | 12.910960 | -1.257691 |

### N-Belt 2<sup>+</sup> (UB3LYP/6-31G(d)) E = -4248.83612625

|   |           |          |           |   |           |           |           |   |           |           |           |
|---|-----------|----------|-----------|---|-----------|-----------|-----------|---|-----------|-----------|-----------|
| N | 1.336745  | 5.361544 | 0.614066  | C | -4.512224 | 6.039228  | -1.564896 | C | 5.408648  | -6.901921 | 2.174208  |
| C | 1.640455  | 6.580205 | 1.256165  | C | -6.188603 | 4.305779  | -1.565674 | H | 3.523303  | -6.403829 | 1.314738  |
| C | 2.333567  | 4.389167 | 0.301459  | C | -4.534548 | 1.562195  | -1.320193 | C | 7.090667  | -5.174532 | 2.178884  |
| C | 2.974013  | 6.927315 | 1.564896  | C | -4.736451 | 0.749358  | 1.320276  | H | 6.521968  | -3.305520 | 1.316614  |
| C | 0.634612  | 7.512377 | 1.565674  | C | 8.681563  | 1.233066  | -2.174208 | C | 0.387572  | -4.832468 | 1.051941  |
| C | 0.000000  | 4.971625 | 0.301316  | H | 7.307530  | -0.150645 | -1.314738 | H | 2.046642  | -4.383481 | 2.351784  |
| C | 3.017189  | 3.727208 | 1.320276  | C | 8.026609  | 3.553432  | -2.178884 | H | -9.411945 | 6.770677  | -2.538308 |
| C | 2.610797  | 4.084586 | -1.051888 | H | 6.123648  | 3.995430  | -1.316614 | H | -8.855297 | 6.208905  | -4.145129 |
| C | 3.272915  | 8.134987 | 2.174208  | C | 4.378826  | -2.080586 | -1.051941 | H | -9.280563 | 7.924880  | -3.894341 |
| H | 3.784227  | 6.253185 | 1.314738  | H | 4.819527  | -0.419296 | -2.351784 | C | -3.017189 | -3.727208 | -1.320276 |
| C | 0.935942  | 8.727964 | 2.178884  | C | 4.305553  | -2.485812 | 0.301316  | C | -8.681563 | -1.233066 | 2.174208  |
| H | -0.398320 | 7.300950 | 1.316614  | H | 4.453442  | -1.892929 | 2.351630  | H | -7.307530 | 0.150645  | 1.314738  |
| C | -0.914373 | 4.708132 | 1.320193  | C | -5.408648 | 6.901921  | -2.174208 | C | -8.026609 | -3.553432 | 2.178884  |
| C | -0.387572 | 4.832468 | -1.051941 | H | -3.523303 | 6.403829  | -1.314738 | H | -6.123648 | -3.995430 | 1.316614  |
| C | 3.991254  | 2.751881 | 1.051941  | C | -7.090667 | 5.174532  | -2.178884 | C | -2.610797 | -4.084586 | 1.051888  |
| H | 2.772885  | 3.964185 | 2.351784  | H | -6.521968 | 3.305520  | -1.316614 | H | -3.866046 | -2.910329 | 2.351630  |

|   |           |           |           |   |           |           |           |   |            |            |           |
|---|-----------|-----------|-----------|---|-----------|-----------|-----------|---|------------|------------|-----------|
| C | 3.620175  | 3.145937  | -1.320193 | C | -4.842754 | 0.218723  | -1.051888 | C | 0.000000   | -4.971625  | -0.301316 |
| C | 1.859314  | 4.663136  | -2.163837 | H | -4.453442 | 1.892929  | -2.351630 | H | 0.587396   | -4.803259  | -2.351630 |
| C | 2.259964  | 9.051122  | 2.497223  | C | -4.967913 | -0.173655 | 0.301459  | C | 6.708520   | -6.482747  | 2.497223  |
| H | 4.300602  | 8.395989  | 2.406336  | H | -4.819527 | 0.419296  | 0.251784  | H | 5.120839   | -7.922425  | 2.406336  |
| H | 0.126235  | 9.415331  | 2.395343  | C | 8.968484  | 2.568375  | -2.497223 | H | 8.090798   | -4.816988  | 2.395343  |
| C | -2.231957 | 4.303309  | 1.051888  | H | 9.421441  | 0.473564  | -2.406336 | C | -0.547584  | -4.990383  | 2.163903  |
| H | -0.587396 | 4.803259  | 2.351630  | H | 8.217033  | 4.598343  | -2.395343 | C | -2.333567  | -4.389167  | -0.301459 |
| C | -1.719262 | 4.476566  | -1.320276 | C | 4.048006  | -2.969413 | -2.163903 | H | -2.772885  | -3.964185  | -2.351784 |
| C | 0.547584  | 4.990383  | -2.163903 | N | 3.974861  | -3.838427 | 0.614066  | C | -8.968484  | -2.568375  | 2.497223  |
| C | 4.305553  | 2.485812  | -0.301316 | C | -6.708520 | 6.482747  | -2.497223 | H | -9.421441  | -0.473564  | 2.406336  |
| C | 4.595590  | 2.020969  | 2.163903  | H | -5.120839 | 7.922425  | -2.406336 | H | -8.217033  | -4.598343  | 2.395343  |
| H | 3.866046  | 2.910329  | -2.351630 | H | -8.090798 | 4.816988  | -2.395343 | C | -1.859314  | -4.663136  | 2.163837  |
| H | 2.391980  | 4.724077  | -3.110881 | C | -4.968051 | -0.721355 | -2.163837 | N | -1.336745  | -5.361544  | -0.614066 |
| O | 2.665275  | 10.203070 | 3.098422  | N | -5.311606 | -1.523117 | 0.614066  | O | 7.503480   | -7.409731  | 3.098422  |
| C | -2.634347 | 4.215512  | -0.301459 | O | 10.168755 | 2.793339  | -3.098422 | H | -0.105910  | -5.294554  | 3.110862  |
| C | -3.108737 | 3.941781  | 2.163837  | C | 3.108737  | -3.941781 | -2.163837 | O | -10.168755 | -2.793339  | 3.098422  |
| H | -2.046642 | 4.383481  | -2.351784 | H | 4.532264  | -2.738997 | -3.110862 | H | -2.391980  | -4.724077  | 3.110881  |
| H | 0.105910  | 5.294554  | -3.110862 | C | 4.878397  | -4.710778 | 1.256165  | C | -1.640455  | -6.580205  | -1.256165 |
| N | 5.311606  | 1.523117  | -0.614066 | C | 2.634347  | -4.215512 | 0.301459  | C | 8.835097   | -7.043038  | 3.431676  |
| C | 4.968051  | 0.721355  | 2.163837  | O | -7.503480 | 7.409731  | -3.098422 | C | -10.516999 | -4.129899  | 3.431676  |
| H | 4.638173  | 2.555557  | 3.110862  | C | -4.595590 | -2.020969 | -2.163903 | C | -2.974013  | -6.927315  | -1.564896 |
| C | 1.681902  | 11.172938 | 3.431676  | H | -5.287161 | -0.290523 | -3.110881 | C | -0.634612  | -7.512377  | -1.565674 |
| N | -3.974861 | 3.838427  | -0.614066 | C | -6.518852 | -1.869426 | 1.256165  | H | 9.411945   | -6.770677  | 2.538308  |
| C | -4.048006 | 2.969413  | 2.163903  | C | -4.305553 | -2.485812 | 0.301316  | H | 8.855297   | -6.208905  | 4.145129  |
| H | -2.895181 | 4.433554  | 3.110881  | C | 10.516999 | 4.129899  | -3.431676 | H | 9.280563   | -7.924880  | 3.894341  |
| C | 6.518852  | 1.869426  | -1.256165 | C | 2.231957  | -4.303309 | -1.051888 | H | -10.569551 | -4.765645  | 2.538308  |
| C | 4.967913  | 0.173655  | -0.301459 | H | 2.895181  | -4.433554 | -3.110881 | H | -9.804718  | -4.564460  | 4.145129  |
| C | 4.842754  | -0.218723 | 1.051888  | C | 4.512224  | -6.039228 | 1.564896  | H | -11.503429 | -4.074763  | 3.894341  |
| H | 5.287161  | 0.290523  | 3.110881  | C | 6.188603  | -4.305779 | 1.565674  | C | -3.272915  | -8.134987  | -2.174208 |
| H | 1.157606  | 11.536322 | 2.538308  | C | 1.719262  | -4.476566 | 1.320276  | H | -3.784227  | -6.253185  | -1.314738 |
| H | 0.949421  | 10.773364 | 4.145129  | C | -8.835097 | 7.043038  | -3.431676 | C | -0.935942  | -8.727964  | -2.178884 |
| H | 2.222866  | 11.999643 | 3.894341  | C | -3.991254 | -2.751881 | -1.051941 | H | 0.398320   | -7.300950  | -1.316614 |
| C | -4.878397 | 4.710778  | -1.256165 | H | -4.638173 | -2.555557 | -3.110862 | C | -2.259964  | -9.051122  | -2.497223 |
| C | -4.305553 | 2.485812  | -0.301316 | C | -7.486237 | -0.888087 | 1.564896  | H | -4.300602  | -8.395989  | -2.406336 |
| C | -4.378826 | 2.080586  | 1.051941  | C | -6.823215 | -3.206598 | 1.565674  | H | -0.126235  | -9.415331  | -2.395343 |
| H | -4.532264 | 2.738997  | 3.110862  | C | -3.620175 | -3.145937 | 1.320193  | O | -2.665275  | -10.203070 | -3.098422 |
| C | 7.486237  | 0.888087  | -1.564896 | H | 10.569551 | 4.765645  | -2.538308 | C | -1.681902  | -11.172938 | -3.431676 |
| C | 6.823215  | 3.206598  | -1.565674 | H | 9.804718  | 4.564460  | -4.145129 | H | -1.157606  | -11.536322 | -2.538308 |
| C | 4.736451  | -0.749358 | -1.320276 | H | 11.503429 | 4.074763  | -3.894341 | H | -0.949421  | -10.773364 | -4.145129 |
| C | 4.534548  | -1.562195 | 1.320193  | C | 0.914373  | -4.708132 | -1.320193 | H | -2.222866  | -11.999643 | -3.894341 |

### N-Belt 2<sup>2+</sup> (UB3LYP/6-31G(d)\_T) E = -4248.57604166

|   |           |          |           |   |           |           |           |   |            |           |           |
|---|-----------|----------|-----------|---|-----------|-----------|-----------|---|------------|-----------|-----------|
| N | 0.241275  | 5.523506 | 0.589627  | C | -5.626347 | 5.024114  | -1.548008 | C | 6.673898   | -5.691285 | 2.155092  |
| C | 0.295860  | 6.760075 | 1.248364  | C | -6.912955 | 2.977436  | -1.589411 | H | 4.736658   | -5.580648 | 1.279876  |
| C | 1.413276  | 4.766839 | 0.275741  | C | -4.750663 | 0.622626  | -1.319926 | C | 7.968650   | -3.649385 | 2.197871  |
| C | 1.537952  | 7.360832 | 1.569743  | C | -4.783692 | -0.206160 | 1.323845  | H | 7.034179   | -1.926681 | 1.356215  |
| C | -0.881488 | 7.473288 | 1.560411  | C | 8.246166  | 2.928981  | -2.202494 | C | 1.341052   | -4.654043 | 1.076801  |
| C | -0.992497 | 4.872357 | 0.276437  | H | 7.167871  | 1.293978  | -1.368997 | H | 2.885516   | -3.891156 | 2.370086  |
| C | 2.212197  | 4.259542 | 1.299322  | C | 7.160011  | 5.089044  | -2.156189 | H | -10.570364 | 4.758298  | -2.561125 |
| C | 1.741133  | 4.520116 | -1.077841 | H | 5.219372  | 5.144986  | -1.272743 | H | -9.900785  | 4.344498  | -4.172779 |
| C | 1.588687  | 8.590200 | 2.196156  | C | 4.701257  | -1.169147 | -1.051273 | H | -10.655040 | 5.939777  | -3.897672 |
| H | 2.465532  | 6.865401 | 1.311775  | H | 4.796724  | 0.542096  | -2.356590 | C | -2.212198  | -4.259542 | -1.299323 |
| C | -0.830420 | 8.710494 | 2.190530  | C | 4.711951  | -1.575131 | 0.303017  | C | -8.246169  | -2.928976 | 2.202491  |
| H | -1.849264 | 7.066404 | 1.294656  | H | 4.736131  | -0.958728 | 2.352597  | H | -7.167869  | -1.293975 | 1.368996  |
| C | -1.832130 | 4.437310 | 1.300759  | C | -6.673900 | 5.691286  | -2.155091 | C | -7.160020  | -5.089042 | 2.156185  |
| C | -1.341055 | 4.654044 | -1.076800 | H | -4.736660 | 5.580648  | -1.279875 | H | -5.219381  | -5.144988 | 1.272740  |
| C | 3.356131  | 3.489904 | 1.034604  | C | -7.968653 | 3.649386  | -2.197870 | C | -1.741136  | -4.520119 | 1.077840  |
| H | 1.927170  | 4.448193 | 2.330211  | H | -7.034183 | 1.926682  | -1.356215 | H | -3.213341  | -3.627011 | 2.372241  |
| C | 2.921409  | 3.806327 | -1.341652 | C | -4.786315 | -0.754669 | -1.047412 | C | 0.992494   | -4.872357 | -0.276437 |
| C | 0.891324  | 4.934754 | -2.191797 | H | -4.736132 | 0.958729  | -2.352597 | H | 1.531188   | -4.601387 | -2.331326 |
| C | 0.407391  | 9.283827 | 2.526107  | C | -4.829638 | -1.158361 | 0.307020  | C | 7.860264   | -5.015868 | 2.496966  |
| H | 2.541042  | 9.050636 | 2.437623  | H | -4.796728 | -0.542097 | 2.356589  | H | 6.604102   | -6.752540 | 2.370437  |
| H | -1.758617 | 9.225978 | 2.407103  | C | 8.271227  | 4.304174  | -2.499784 | H | 8.873642   | -3.099659 | 2.428419  |
| C | -3.038367 | 3.769286 | 1.036994  | H | 9.116103  | 2.330967  | -2.453654 | C | 0.459269   | -4.993290 | 2.191422  |
| H | -1.531190 | 4.601385 | 2.331326  | H | 7.150688  | 6.155165  | -2.350292 | C | -1.413279  | -4.766841 | -0.275741 |
| C | -2.578752 | 4.044737 | -1.339639 | C | 4.553287  | -2.109346 | -2.160147 | H | -1.927170  | -4.448192 | -2.330211 |
| C | -0.459273 | 4.993290 | -2.191422 | N | 4.657154  | -2.968039 | 0.623465  | C | -8.271233  | -4.304169 | 2.499780  |
| C | 3.718632  | 3.292869 | -0.319103 | C | -7.860267 | 5.015869  | -2.496965 | H | -9.116104  | -2.330959 | 2.453651  |
| C | 4.094450  | 2.901410 | 2.150422  | H | -6.604103 | 6.752541  | -2.370435 | H | -7.150700  | -6.155163 | 2.350287  |

|   |           |           |           |   |            |           |           |   |            |            |           |
|---|-----------|-----------|-----------|---|------------|-----------|-----------|---|------------|------------|-----------|
| H | 3.213337  | 3.627009  | -2.372242 | H | -8.873646  | 3.099661  | -2.428417 | C | -0.891328  | -4.934756  | 2.191796  |
| H | 1.401722  | 5.100733  | -3.138090 | C | -4.721584  | -1.704080 | -2.156358 | N | -0.241277  | -5.523508  | -0.589626 |
| O | 0.574776  | 10.472512 | 3.139216  | O | -4.897309  | -2.550844 | 0.627401  | O | 8.816989   | -5.764864  | 3.088869  |
| C | -3.417297 | 3.603501  | -0.316440 | N | 9.395460   | 4.759680  | -3.095852 | H | 0.954074   | -5.202917  | 3.137331  |
| C | -3.824475 | 3.247595  | 2.153428  | C | 3.824472   | -3.247597 | -2.153427 | O | -9.395468  | -4.759673  | 3.095847  |
| H | -2.885520 | 3.891157  | -2.370085 | H | 4.983831   | -1.793809 | -3.108175 | H | -1.401725  | -5.100734  | 3.138089  |
| H | -0.954077 | 5.202917  | -3.137331 | C | 5.714656   | -3.641715 | 1.261500  | C | -0.295857  | -6.760077  | -1.248362 |
| N | 4.897307  | 2.550843  | -0.627403 | C | 3.417294   | -3.603501 | 0.316441  | C | 10.053961  | -5.150828  | 3.445366  |
| C | 4.721585  | 1.704080  | 2.156356  | O | -8.816991  | 5.764866  | -3.088866 | C | -9.496913  | -6.146431  | 3.412891  |
| H | 4.030220  | 3.439663  | 3.093750  | C | -4.094450  | -2.901410 | -2.150423 | C | -1.537946  | -7.360844  | -1.569738 |
| C | -0.574501 | 11.244400 | 3.490014  | H | -5.123532  | -1.352188 | -3.104148 | C | 0.881495   | -7.473283  | -1.560411 |
| N | -4.657157 | 2.968038  | -0.623465 | C | -6.010570  | -3.128812 | 1.264463  | H | 10.570362  | -4.758295  | 2.561127  |
| C | -4.553290 | 2.109345  | 2.160147  | C | -3.718634  | -3.292870 | 0.319102  | H | 9.900781   | -4.344495  | 4.172781  |
| H | -3.712995 | 3.778263  | 3.096661  | C | 9.496901   | 6.146439  | -3.412897 | H | 10.655038  | -5.939773  | 3.897675  |
| C | 6.010566  | 3.128812  | -1.264465 | C | 3.038365   | -3.769287 | -1.036994 | H | -9.441141  | -6.764374  | 2.508613  |
| C | 4.829637  | 1.158361  | -0.307021 | H | 3.712992   | -3.778265 | -3.096661 | H | -8.713226  | -6.450084  | 4.117479  |
| C | 4.786315  | 0.754669  | 1.047411  | C | 5.626344   | -5.024114 | 1.548009  | H | -10.474209 | -6.271411  | 3.879350  |
| H | 5.123532  | 1.352189  | 3.104146  | C | 6.912952   | -2.977435 | 1.589412  | C | -1.588673  | -8.590213  | -2.196150 |
| H | -1.151719 | 11.518627 | 2.599283  | C | 2.578748   | -4.044737 | 1.339639  | H | -2.465528  | -6.865421  | -1.311769 |
| H | -1.214008 | 10.700982 | 4.195432  | C | -10.053964 | 5.150831  | -3.445363 | C | 0.830435   | -8.710489  | -2.190528 |
| H | -0.188413 | 12.145369 | 3.966460  | C | -3.356132  | -3.489904 | -1.034605 | H | 1.849268   | -7.066391  | -1.294657 |
| C | -5.714659 | 3.641715  | -1.261499 | H | -4.030220  | -3.439663 | -3.093752 | C | -0.407373  | -9.283831  | -2.526103 |
| C | -4.711953 | 1.575131  | -0.303017 | C | -7.144727  | -2.352235 | 1.597814  | H | -2.541025  | -9.050656  | -2.437615 |
| C | -4.701259 | 1.169146  | 1.051272  | C | -6.052720  | -4.508836 | 1.545446  | H | 1.758635   | -9.225966  | -2.407102 |
| H | -4.983834 | 1.793807  | 3.108175  | C | -2.921412  | -3.806328 | 1.341651  | O | -0.574750  | -10.472518 | -3.139211 |
| C | 7.144726  | 2.352238  | -1.597816 | H | 9.441129   | 6.764383  | -2.508619 | C | 0.574531   | -11.244399 | -3.490009 |
| C | 6.052713  | 4.508836  | -1.545449 | H | 8.713214   | 6.450090  | -4.117485 | H | 1.151754   | -11.518621 | -2.599279 |
| C | 4.783690  | 0.206159  | -1.323846 | H | 10.474198  | 6.271421  | -3.879356 | H | 1.214034   | -10.700978 | -4.195430 |
| C | 4.750662  | -0.622626 | 1.319925  | C | 1.832127   | -4.437311 | -1.300758 | H | 0.188449   | -12.145371 | -3.966454 |

### N-Belt 2<sup>3+</sup> (UB3LYP/6-31G(d)\_Q) E = -4248.25556306

|   |           |            |           |   |           |           |           |   |           |           |           |
|---|-----------|------------|-----------|---|-----------|-----------|-----------|---|-----------|-----------|-----------|
| N | -0.746266 | -5.474847  | 0.613510  | C | 5.130161  | -5.518053 | -1.540318 | C | -6.111401 | 6.278346  | 2.139385  |
| C | -0.916576 | -6.713489  | 1.240689  | C | 6.624266  | -3.604533 | -1.537616 | H | -4.185342 | 5.983803  | 1.290095  |
| C | -1.844606 | -4.612141  | 0.298739  | C | 4.680233  | -1.061341 | -1.318892 | C | -7.612338 | 4.368707  | 2.139997  |
| C | -2.212077 | -7.201778  | 1.550630  | C | 4.789425  | -0.227163 | 1.323602  | H | -6.846259 | 2.575221  | 1.284714  |
| C | 0.191967  | -7.539956  | 1.538024  | C | -8.490249 | -2.156830 | -2.152846 | C | -0.908263 | 4.753639  | 1.053976  |
| C | 0.543063  | -4.937833  | 0.299977  | H | -7.273357 | -0.633849 | -1.305841 | H | -2.515111 | 4.138242  | 2.349455  |
| C | -2.594042 | -4.033675  | 1.321959  | C | -7.588634 | -4.412170 | -2.142884 | H | 10.098967 | -5.754820 | -2.493391 |
| C | -2.147608 | -4.339469  | -1.055610 | H | -5.655027 | -4.643749 | -1.281136 | H | 9.492685  | -5.256231 | -4.110012 |
| C | -2.377903 | -8.432101  | 2.149476  | C | -4.570696 | 1.589188  | -1.059221 | H | 10.058570 | -6.929274 | -3.839156 |
| H | -3.088637 | -6.615769  | 1.304753  | H | -4.840103 | -0.110265 | -2.354621 | C | 2.594042  | 4.033675  | -1.321959 |
| C | 0.026214  | -8.778079  | 2.140179  | C | -4.548909 | 1.997917  | 0.294679  | C | 8.490249  | 2.156830  | 2.152846  |
| H | 1.193386  | -7.217750  | 1.280957  | H | -4.641158 | 1.400483  | 2.349857  | H | 7.273357  | 0.633849  | 1.305841  |
| C | 1.419210  | -4.581712  | 1.324170  | C | 6.111401  | -6.278346 | -2.139385 | C | 7.588634  | 4.412170  | 2.142884  |
| C | 0.908263  | -4.753639  | -1.053976 | H | 4.185342  | -5.983803 | -1.290095 | H | 5.655027  | 4.643749  | 1.281136  |
| C | -3.664326 | -3.163774  | 1.056152  | C | 7.612338  | -4.368707 | -2.139997 | C | 2.147608  | 4.339469  | 1.055610  |
| H | -2.328191 | -4.245913  | 2.353321  | H | 6.846259  | -2.575221 | -1.284714 | H | 3.532288  | 3.319897  | 2.352749  |
| C | -3.259174 | -3.522987  | -1.321441 | C | 4.832123  | 0.309773  | -1.054516 | C | -0.543063 | 4.937833  | -0.299977 |
| C | -1.339969 | -4.833092  | -2.169065 | H | 4.641158  | -1.400483 | -2.349857 | H | -1.105660 | 4.716650  | -2.355148 |
| C | -1.263621 | -9.241641  | 2.464031  | C | 4.916461  | 0.709955  | 0.299419  | C | -7.368541 | 5.718601  | 2.458999  |
| H | -3.368173 | -8.808928  | 2.382619  | H | 4.840103  | 0.110265  | 2.354621  | H | -5.942470 | 7.325199  | 2.368611  |
| H | 0.900503  | -9.384022  | 2.346106  | C | -8.634177 | -3.526446 | -2.468098 | H | -8.573477 | 3.914779  | 2.350069  |
| C | 2.682378  | -4.027331  | 1.059642  | H | -9.311212 | -1.487311 | -2.386834 | C | 0.000512  | 5.014292  | 2.168436  |
| H | 1.105660  | -4.716650  | 2.355148  | H | -7.676349 | -5.472229 | -2.349123 | C | 1.844606  | 4.612141  | -0.298739 |
| C | 2.197060  | -4.261781  | -1.318430 | C | -4.340142 | 2.506039  | -2.173711 | H | 2.328191  | 4.245913  | -2.353321 |
| C | -0.000512 | -5.014292  | -2.168436 | N | -4.368613 | 3.382968  | 0.607939  | C | 8.634177  | 3.526446  | 2.468098  |
| C | -4.005975 | -2.941069  | -0.298146 | C | 7.368541  | -5.718601 | -2.458999 | H | 9.311212  | 1.487311  | 2.386834  |
| C | -4.344581 | -2.505699  | 2.169723  | H | 5.942470  | -7.325199 | -2.368611 | H | 7.676349  | 5.472229  | 2.349123  |
| H | -3.532288 | -3.319897  | -2.352749 | H | 8.573477  | -3.914779 | -2.350069 | C | 1.339969  | 4.833092  | 2.169065  |
| H | -1.863456 | -4.957087  | -3.114431 | C | 4.856689  | 1.254817  | -2.168960 | N | 0.746266  | 5.474847  | -0.613510 |
| O | -1.542355 | -10.415505 | 3.046527  | N | 5.115171  | 2.092709  | 0.612866  | O | -8.244606 | 6.548430  | 3.041139  |
| C | 3.071610  | -3.901752  | -0.294305 | O | -9.789342 | -3.871373 | -3.052509 | H | -0.472205 | 5.273112  | 3.113254  |
| C | 3.512625  | -3.574771  | 2.173863  | C | -3.512625 | 3.574771  | -2.173863 | O | 9.789342  | 3.871373  | 3.052509  |
| H | 2.515111  | -4.138242  | -2.349455 | H | -4.799794 | 2.226044  | -3.118940 | H | 1.863456  | 4.957087  | 3.114431  |
| H | 0.472205  | -5.273112  | -3.113254 | C | -5.355262 | 4.150881  | 1.235291  | C | 0.916576  | 6.713489  | -1.240689 |
| N | -5.115171 | -2.092709  | -0.612866 | C | -3.071610 | 3.901752  | 0.294305  | C | -9.553239 | 6.076860  | 3.386914  |
| C | -4.856689 | -1.254817  | 2.168960  | O | 8.244606  | -6.548430 | -3.041139 | C | 10.035157 | 5.241431  | 3.394603  |
| H | -4.332932 | -3.043590  | 3.115065  | C | 4.344581  | 2.505699  | -2.169723 | C | 2.212077  | 7.201778  | -1.550630 |
| C | -0.478618 | -11.313584 | 3.387722  | H | 5.225875  | 0.862300  | -3.113820 | C | -0.191967 | 7.539956  | -1.538024 |

|   |           |            |           |   |            |           |           |   |            |           |           |
|---|-----------|------------|-----------|---|------------|-----------|-----------|---|------------|-----------|-----------|
| N | 4.368613  | -3.382968  | -0.607939 | C | 6.272520   | 2.564070  | 1.241316  | H | -10.098967 | 5.754820  | 2.493391  |
| C | 4.340142  | -2.506039  | 2.173711  | C | 4.005975   | 2.941069  | 0.298146  | H | -9.492685  | 5.256231  | 4.110012  |
| H | 3.356789  | -4.089579  | 3.119281  | C | -10.035157 | -5.241431 | -3.394603 | H | -10.058570 | 6.929274  | 3.839156  |
| C | -6.272520 | -2.564070  | -1.241316 | C | -2.682378  | 4.027331  | -1.059642 | H | 10.032337  | 5.872178  | 2.499029  |
| C | -4.916461 | -0.709955  | -0.299419 | H | -3.356789  | 4.089579  | -3.119281 | H | 9.292217   | 5.602126  | 4.114260  |
| C | -4.832123 | -0.309773  | 1.054516  | C | -5.130161  | 5.518053  | 1.540318  | H | 11.024648  | 5.253622  | 3.849848  |
| H | -5.225875 | -0.862300  | 3.113820  | C | -6.624266  | 3.604533  | 1.537616  | C | 2.377903   | 8.432101  | -2.149476 |
| H | 0.069720  | -11.624753 | 2.491952  | C | -2.197060  | 4.261781  | 1.318430  | H | 3.088637   | 6.615769  | -1.304753 |
| H | 0.204591  | -10.851498 | 4.108604  | C | 9.553239   | -6.076860 | -3.386914 | C | -0.026214  | 8.778079  | -2.140179 |
| H | -0.962744 | -12.177580 | 3.841179  | C | 3.664326   | 3.163774  | -1.056152 | H | -1.193386  | 7.217750  | -1.280957 |
| C | 5.355262  | -4.150881  | -1.235291 | H | 4.332932   | 3.043590  | -3.115065 | C | 1.263621   | 9.241641  | -2.464031 |
| C | 4.548909  | -1.997917  | -0.294679 | C | 7.342519   | 1.685852  | 1.552283  | H | 3.368173   | 8.808928  | -2.382619 |
| C | 4.570696  | -1.589188  | 1.059221  | C | 6.434143   | 3.937218  | 1.539065  | H | -0.900503  | 9.384022  | -2.346106 |
| H | 4.799794  | -2.226044  | 3.118940  | C | 3.259174   | 3.522987  | 1.321441  | O | 1.542355   | 10.415505 | -3.046527 |
| C | -7.342519 | -1.685852  | -1.552283 | H | -10.032337 | -5.872178 | -2.499029 | C | 0.478618   | 11.313584 | -3.387722 |
| C | -6.434143 | -3.937218  | -1.539065 | H | -9.292217  | -5.602126 | -4.114260 | H | -0.069720  | 11.624753 | -2.491952 |
| C | -4.789425 | 0.227163   | -1.323602 | H | -11.024648 | -5.253622 | -3.849848 | H | -0.204591  | 10.851498 | -4.108604 |
| C | -4.680233 | 1.061341   | 1.318892  | C | -1.419210  | 4.581712  | -1.324170 | H | 0.962744   | 12.177580 | -3.841179 |



## 7. References

- 1 M. Kuprat, M. Lehmann, A. Schulz and A. Villinger, *Organometallics* 2010, **29**, 1421.
- 2 G. Povie, Y. Segawa, T. Nishihara, Y. Miyauchi and K. Itami, *Science* 2017, **356**, 172–175.
- 3 G. M. Sheldrick, *Acta Crystallogr.* 2015, **A71**, 3-8.
- 4 G. M. Sheldrick, *Acta Crystallogr.* 2015, **C71**, 3-8.
- 5 O. V. Dolomanov, L. J. Bourhis, R. J. Gildea, J. A. K. Howard and H. Puschmann, *J. Appl. Crystallogr.* 2009, **42**, 339–341.
- 6 M. J. Frisch, G. W. Trucks, H. B. Schlegel, G. E. Scuseria, M. A. Robb, J. R. Cheeseman, G. Scalmani, V. Barone, G. A. Petersson, H. Nakatsuji, X. Li, M. Caricato, A. V. Marenich, J. Bloino, B. G. Janesko, R. Gomperts, B. Mennucci, H. P. Hratchian, J. V. Ortiz, A. F. Izmaylov, J. L. Sonnenberg, D. Williams-Young, F. Ding, F. Lipparini, F. Egidi, J. Goings, B. Peng, A. Petrone, T. Henderson, D. Ranasinghe, V. G. Zakrzewski, J. Gao, N. Rega, G. Zheng, W. Liang, M. Hada, M. Ehara, K. Toyota, R. Fukuda, J. Hasegawa, M. Ishida, T. Nakajima, Y. Honda, O. Kitao, H. Nakai, T. Vreven, K. Throssell, J. A. Montgomery, Jr., J. E. Peralta, F. Ogliaro, M. J. Bearpark, J. J. Heyd, E. N. Brothers, K. N. Kudin, V. N. Staroverov, T. A. Keith, R. Kobayashi, J. Normand, K. Raghavachari, A. P. Rendell, J. C. Burant, S. S. Iyengar, J. Tomasi, M. Cossi, J. M. Millam, M. Klene, C. Adamo, R. Cammi, J. W. Ochterski, R. L. Martin, K. Morokuma, O. Farkas, J. B. Foresman and D. J. Fox, Gaussian 16, Revision C.01, Gaussian, Inc., Wallingford CT, 2019.
- 7 (a) A. D. Becke, *J. Chem. Phys.* 1993, **98**, 5648. (b) C. Lee, W. Yang, R. G. Parr, *Phys. Rev. B* 1988, **37**, 785–789.
